# A frequency-domain machine learning method for dual-calibrated fMRI mapping of oxygen extraction fraction (OEF) and cerebral metabolic rate of oxygen consumption (CMRO<sub>2</sub>)

Michael Germuska<sup>1</sup>, Hannah Chandler<sup>1</sup>, Thomas Okell<sup>2</sup>, Fabrizio Fasano<sup>3</sup>, Valentina Tomassini<sup>1,4,5</sup>, Kevin Murphy<sup>1</sup>, Richard Wise<sup>1,6</sup>.

<sup>1</sup> CUBRIC, Department of Psychology, Cardiff University, Cardiff, United Kingdom

<sup>2</sup> Wellcome Centre for Integrative Neuroimaging, FMRIB, Nuffield Department of Clinical Neurosciences, University of Oxford, United Kingdom

<sup>3</sup> Siemens Healthcare Ltd, Frimley, Camberley, UK.

<sup>4</sup> Division of Psychological Medicine and Clinical Neurosciences, Cardiff University School of Medicine, Cardiff, United Kingdom

<sup>5</sup> Department of Neuroscience, Imaging and Clinical Sciences, "G. D'Annunzio University" of Chieti-Pescara, 66100, Chieti, Italy

<sup>6</sup> Institute for Advanced Biomedical Technologies, "G. D'Annunzio University" of Chieti-Pescara, 66100, Chieti, Italy

## \* Correspondence:

Michael Germuska  
germuskam@cardiff.ac.uk

**Keywords:** magnetic resonance imaging, metabolism, oxygen extraction fraction, CMRO<sub>2</sub>, OEF, BOLD, artificial neural networks, machine learning, calibrated-fMRI.

## Abstract

Magnetic resonance imaging (MRI) offers the possibility to non-invasively map the brain's metabolic oxygen consumption (CMRO<sub>2</sub>), which is essential for understanding and monitoring neural function in both health and disease. However, in depth study of oxygen metabolism with MRI has so far been hindered by the lack of robust methods. One MRI method of mapping CMRO<sub>2</sub> is based on the simultaneous acquisition of cerebral blood flow (CBF) and blood oxygen level dependent (BOLD) weighted images during respiratory modulation of both oxygen and carbon dioxide. Although this dual-calibrated methodology has shown promise in the research setting, current analysis methods are unstable in the presence of noise and/or are computationally demanding. In this paper, we present a machine learning implementation for the multi-parametric assessment of dual-calibrated fMRI data. The proposed method aims to address the issues of stability, accuracy, and computational overhead, removing significant barriers to the investigation of oxygen metabolism with MRI. The method utilizes a time-frequency transformation of the acquired perfusion and BOLD-weighted data, from which appropriate feature vectors are selected for training of machine learning regressors. The implemented machine learning methods are chosen for their robustness to noise and their ability to map complex non-linear relationships (such as those that exist between BOLD signal weighting and blood oxygenation). An extremely randomized trees (ET) regressor is used to estimate resting blood flow and a multi-layer perceptron (MLP) is used to estimate CMRO<sub>2</sub> and the oxygen extraction fraction (OEF). Synthetic data with additive noise are used to train the regressors, with data

simulated to cover a wide range of physiologically plausible parameters. The performance of the implemented analysis method is compared to published methods both in simulation and with *in-vivo* data (n=30). The proposed method is demonstrated to significantly reduce computation time, error, and proportional bias in both CMRO<sub>2</sub> and OEF estimates. The introduction of the proposed analysis pipeline has the potential to not only increase the detectability of metabolic difference between groups of subjects, but may also allow for single subject examinations within a clinical context.

## 1 Introduction

Under normal conditions the brain's energy needs are met via a continuous supply of oxygen and glucose for the local production of ATP via aerobic metabolism (Verweij et al., 2007). Any disruption of the supply of oxygen to the brain tissue can have significant consequences (Safar, 1988), and impaired cerebral oxygen metabolism is associated with a wide variety of neurological conditions (Frackowiak et al., 1988; Ishii et al., 1996; Miles and Williams, 2008). Therefore, monitoring and mapping the brain's consumption of oxygen is vital for understanding the diseases and mechanisms by which the metabolic consumption of oxygen may be affected. The cerebral metabolic rate of oxygen consumption (CMRO<sub>2</sub>) has traditionally been measured with positron emission tomography (Frackowiak et al., 1980). However, this method has some substantial limitations including the use of ionizing radiation and the need for local production of 15-oxygen labeled tracers. Due to these limitations there is great interest in developing alternative, non-invasive, methods of mapping CMRO<sub>2</sub>. One promising technique of non-invasively mapping CMRO<sub>2</sub> is the so-called dual-calibrated fMRI (dc-fMRI) method (Bulte et al., 2012; Gauthier et al., 2012). This method is finding growing adoption in the research setting, and has already been applied in Alzheimer's disease (Lajoie et al., 2017), carotid artery occlusion (De Vis et al., 2015), and studies of pharmacological modulation (Merola et al., 2017). For a review of the method and details on the its practical application please see (Germuska and Wise, 2019). Despite the promise shown by this technique, the reported between-session repeatability is relatively low (Merola et al., 2018) and improvements in the data acquisition and/or analysis are required if individualized assessment is to be made possible.

One of the key difficulties in analyzing dual-calibrated fMRI data is noise propagation through the analysis pipeline, which leads to unstable parameter estimates. We have previously presented regularized non-linear least squares fitting approaches that utilize prior physiological knowledge to produce more robust parameter estimates (Germuska et al., 2019; Germuska et al., 2016). Even though such regularization reduces the mean square error it does so by trading off a reduction in variance with an increase in bias. An alternative approach to reduce the prediction error is the use of noise insensitive machine learning regression methods. Decision tree based regression methods, for example random forest (Breiman, 2001) and extremely randomized trees (Geurts et al., 2006), are robust to both output (Breiman, 2001; Geurts et al., 2006) and input noise (Yue et al., 2018) and are able to capture non-linear relationships between input features and target parameters. This noise immunity is likely due to the randomization included in the choices of features at splitting nodes (random forest) and cut-points (extremely randomized trees), which improve the generalizability of the regressors. For non-linear mappings with a high degree of complexity artificial neural networks such as the multi-layer perceptron (MLP), a feedforward network with multiple hidden layers, offer a machine learning method that is inherently robust to noise (Bernier et al., 1999). In this paper we present an analysis pipeline comprised of an extremely randomized trees regressor and a MLP, cascaded to infer resting CBF and CMRO<sub>2</sub> from dual-calibrated fMRI data. A frequency-domain

representation of simulated MRI data with the additive noise is used to train each of the regressors. Simulated data has the advantage over *in-vivo* data in this application as it allows a balanced dataset to be generated that covers a broad range of physiological variation. Such a dataset is essential to avoid bias in parameter estimation and to provide generalizability across groups and diseases. A frequency-domain representation is chosen as it allows for convenient dimensionality reduction, with most of the information of interest encoded at low temporal frequencies, and takes advantage of the superior ability of artificial neural networks to learn discriminative features from frequency-domain representation of a signal compared to a time-domain representation (Hertel et al., 2016). The performance of the proposed machine learning (ML) implementation is compared to an existing regularized non-linear least squares (rNLS) method (Germuska et al., 2019) both in simulation and in data acquired from a cohort of 30 healthy volunteers. We hypothesized that the machine learning approach would be able to achieve comparable or reduced prediction error with significantly reduced bias and computational overhead.

## 2 MRI Data Acquisition

Thirty healthy volunteers (16 males, mean age  $32.53 \pm 6.06$  years) were recruited to the study. The local ethics committee approved the study and written informed consent was obtained from each participant. Blood samples were drawn via a finger prick prior to scanning and were analyzed with the HemoCue Hb 301 System (HemoCue, Ängelholm, Sweden) to calculate the systemic [Hb] value for each participant. All data was acquired using a Siemens MAGNETOM Prisma (Siemens Healthcare GmbH, Erlangen) 3T clinical scanner with a 32-channel receiver head coil (Siemens Healthcare GmbH, Erlangen). The acquisition protocol was as previously described (Germuska et al., 2019). Briefly, an 18-minute dual-excitation pseudo-continuous arterial spin labeling (pCASL) and BOLD-weighted acquisition was acquired during modulation of inspired oxygen and carbon dioxide. Gas modulation was performed according to a protocol previously proposed by our lab (Germuska et al., 2016), and end-tidal monitoring was performed throughout the acquisition from the volunteer's facemask using a rapidly responding gas analyzer (PowerLab®, ADInstruments, Sydney, Australia). The prototype pCASL sequence (Germuska et al., 2019) parameters were as follows: post-labeling delay and label duration 1.5 seconds, EPI readout with GRAPPA acceleration (factor = 3),  $TE_1 = 10\text{ms}$ ,  $TE_2 = 30\text{ms}$ ,  $TR = 4.4$  seconds,  $3.4 \times 3.4\text{mm}$  in-plane resolution, and 15 (7mm) slices with 20% slice gap.

## 3 Synthetic MRI Data Generation

Synthetic data was simulated to match the 18-minute *in-vivo* acquisition protocol using standard physiological models for the change in BOLD signal (Bulte et al., 2012; Gauthier and Hoge, 2013; Wise et al., 2013), as summarized by equation 1.

$$\frac{\Delta BOLD}{BOLD_0} = M \left\{ 1 - \left( \frac{CBF}{CBF_0} \right)^\alpha \left( \frac{1 - \frac{CaO_2 - CMRO_2/CBF}{\phi[Hb]}}{1 - \frac{CaO_{2,0} - CMRO_{2,0}/CBF_0}{\phi[Hb]}} \right)^\beta \right\} \quad (1)$$

Where,  $\Delta BOLD/BOLD_0$  is the fractional change in BOLD signal due to a change in arterial oxygen content ( $CaO_2$ ) or CBF due to either a hyperoxic or hypercapnic respiratory stimulus.  $M$  is a lumped parameter that is equal to  $K \cdot ((1 - SvO_2) \cdot [Hb])^\beta$ . Where  $K$  is a scaling factor dependent on the field strength, resting venous blood volume, tissue structure, and water diffusion effects in the

extravascular space. [Hb] is the blood hemoglobin concentration and SvO<sub>2</sub> is the venous oxygen saturation.  $\phi$  is the oxygen binding capacity for Hb (1.34 ml/g),  $\alpha$  is the Grubb exponent that couples blood volume and blood flow changes, and  $\beta$  is a field strength dependent constant that summarizes the non-linear effects associated with the tissue structure and water diffusion effects. The values of  $\alpha$  and  $\beta$  were fixed to the optimized values (0.06 and 1) found by (Merola et al., 2016), which minimize the error in OEF estimates over a range of vascular physiology. The subscript 0 represents the baseline or resting state. The hyperoxic and hypercapnic stimuli are assumed to be iso-metabolic, so  $CMRO_2 = CMRO_{2,0}$ .

The arterial spin labeling signal was modeled according to the simplified pCASL kinetic model (Alsop et al., 2015), and physiological constraints on baseline parameters were applied according to a simple model of oxygen exchange (Gjedde, 2002; Hayashi et al., 2003), equation 2.

$$CMRO_{2,0} = D \left[ P_{50}^h \sqrt{\frac{2}{OEF_0} - 1} - P_{minO_2} \right] \quad (2)$$

Where D is the effective oxygen diffusivity of the capillary network and can be expressed as a product of the effective oxygen permeability and the capillary blood volume,  $D = \kappa \cdot CBV_{cap}$ .  $P_{50}$  is the blood oxygen tension at which hemoglobin is 50% saturated (26 mmHg), h is the Hill coefficient (2.8) and  $P_{minO_2}$  is the minimum oxygen tension at the mitochondria (which is thought to be negligible in healthy tissue (Gjedde, 2002)). In the modeling we assume a fixed value for  $\kappa$  of 3  $\mu\text{mol}/\text{mmHg}/\text{ml}/\text{min}$ , corresponding to a typical diffusivity of 3 (Mintun et al., 2001) to 4  $\mu\text{mol}/100\text{g}/\text{mmHg}/\text{min}$  (Vafaei and Gjedde, 2000) for  $CBV_{cap} = 1$  to 1.33 ml/100g. The physiological parameter space encompasses a wide range of plausible physiology including both healthy and dysfunctional brain tissue, and is summarized in Table 1. A summary of MRI abbreviations and all model parameters used in the simulations is given in table 2.

The partial pressure of arterial oxygen (PaO<sub>2</sub>) and change in carbon dioxide ( $\Delta\text{PaCO}_2$ ) were modeled to match the range of end-tidal recordings acquired from healthy volunteers. The baseline PaO<sub>2</sub> had a range of 90-120 mmHg,  $\Delta\text{PaO}_2$  was 200 to 300 mmHg, and  $\Delta\text{PaCO}_2$  was set to 8-12 mmHg. Rectangular stimulus blocks were convolved with a gamma density function with shape parameter 0.5-2.5 to account for the variation in biological rise and fall times of the hyperoxic and hypercapnic stimuli. Drift in  $\Delta\text{PaCO}_2$ , which was observed in some subjects, was included by adding a bandpass filtered noise signal (4<sup>th</sup> order IIR filter, lowcut/highcut = 0.005/0.05 of the Nyquist frequency). Change in the arterial blood longitudinal relaxation rate due to dissolved oxygen was included in pCASL calculations as per (Germuska et al., 2019). Noise (BOLD tSNR = 90, pCASL tSNR = 3 for CBF = 60 ml/100g/min) was added to simulated BOLD and pCASL time series. The pCASL noise was bandpass filtered (4<sup>th</sup> order IIR filter, lowcut/highcut = 0.05/0.8 of the Nyquist frequency) and the BOLD noise was lowpass filtered (1<sup>st</sup> order IIR filter, highcut = 0.5 of the Nyquist frequency) to match the noise characteristics of the *in-vivo* data. In addition, the BOLD timeseries data was highpass filtered with a 320 second cut-off using the filter implementation in FSL (Jenkinson et al., 2012), which is routinely used for de-trending fMRI data. Figure 1 shows 50 randomly generated pCASL and BOLD timeseries overlaid with the temporal mean to demonstrate the typical output of the simulations. Please note that the pCASL timeseries are divided by the equilibrium magnetization of arterial blood ( $M_{0\text{blood}}$ ), and the baseline signal has been set to zero for display purposes.

## 4 Methods



A schematic diagram describing the analysis/training pipeline is shown in figure 2. ASL and BOLD timeseries data, either simulated (as described in section 3) or *in-vivo* data, are Fourier transformed into magnitude and phase data. This frequency domain data is then truncated after the first 15 data points (low pass filtered) and combined with physiological recordings and sequence parameters to create a feature vector for model training/prediction (if *in-vivo* data is being analyzed). Parameter estimation is carried out in a two-stage process; first the resting blood flow (CBF<sub>0</sub>) is estimated, and then rate of oxygen consumption.

Truncation of the frequency domain data removes high-frequency content that is unrelated to either the hyperoxic or hypercapnic respiratory modulations and thus removes noise from the training data. The resting blood flow is estimated separately from the rate of oxygen consumption to reduce the complexity of the required mapping between the MRI data and the target parameters. Additionally, the use of extremely randomized trees (ET) regression rather than an artificial neural network at this stage in the pipeline takes full advantage of the noise immunity of decision tree based methods (Yue et al., 2018) and reduces the potential of overfitting. The inclusion of the post-label delay in the feature vector is necessary to incorporate an implicit slice timing correction for CBF<sub>0</sub> calculation, while the blood oxygenation parameters ([Hb], ΔPaO<sub>2</sub>, SaO<sub>2,0</sub>, CaO<sub>2,0</sub>) are included here due to the influence of dissolved oxygen on the longitudinal relaxation rate of arterial blood. In total each feature vector that is input into the ET regressor consists of 65 entries.

The result of the ET regression is then incorporated into the feature vector (now 66 entries) and input into an ensemble of MLPs to predict CMRO<sub>2,0</sub> / CaO<sub>2,0</sub>, from which CMRO<sub>2,0</sub> and OEF<sub>0</sub> can be calculated (CMRO<sub>2</sub> / CaO<sub>2</sub> = OEF x CBF via the Fick principle). The blood oxygenation parameters in this case not only inform on the relaxation rate of arterial blood, but also link the CBF and BOLD signal changes to the underlying metabolic parameters as described by equation 1. In practice each MLP in the ensemble is trained individually, with the average of their predictions being used for inference when deployed for the analysis of *in-vivo* data.

The ET regressor and MLP were implemented in Scikit learn (Pedregosa et al., 2011). The extremely randomized trees regressor was trained with the following options, number of estimators = 50, bootstrap = True, and out-of-bag samples were used to estimate the R<sup>2</sup> on unseen data. A total of 50,000 simulations were used for training. The MLP network has two-hidden layers and 50 nodes in each layer. The activation function for each node was chosen to be a rectified linear unit (ReLU). The ADAM solver was used for training with 1x10<sup>6</sup> simulated feature vectors and 10% of the data were used for early stopping. Data simulation and training was repeated 40 times to create an ensemble of MLP networks to further reduce the uncertainty in parameter estimates (Sollich and Krogh, 1996).

The validation score for the extremely randomized trees regressor for predicting resting cerebral blood flow was 0.997, slightly greater than the results obtained for a random forest implementation (0.961). The validation score for the MLP estimation of CMRO<sub>2,0</sub> / CaO<sub>2,0</sub> were 0.923 ± 0.002. Training of the MLP network was also undertaken while eliminating key elements of the simulation or feature vectors to see how this affected the performance of the MLP. When BOLD data was excluded from the feature vector the validation score dropped to 0.577. Excluding the CO<sub>2</sub> and O<sub>2</sub> stimuli (but including the BOLD data) reduced the validation scores to 0.63 and 0.71 respectively.

A further 5,000 simulated datasets (with OEF restricted to 0.15 to 0.65, all other parameters as in table 1) were constructed to compare the performance of the proposed machine learning implementation with a previously implemented regularized non-linear least squares fitting method (Germuska et al., 2019). Each method was compared to the simulated data using a robust regression

method (bisquare) in terms of the RMS error and proportional bias. A bisquare cost function was used for the regression to reduce the influence of outliers and allow a robust estimate of the proportional bias. The rNLS fitting was implemented with regularization applied to the resting OEF and the effective oxygen diffusivity ( $D$ ), as previously described. The relative weighting between OEF and diffusivity regularization was maintained constant, as per the optimization in (Germuska et al., 2019). However, the total weighting was varied to assess the impact on OEF and CMRO<sub>2</sub> error and proportional bias (slope of the simulated parameter values plotted against the parameter estimates).

## 5 Results

### 5.1 Simulations

Analysis of the simulated data demonstrated a substantial reduction in the RMS error of machine learning OEF estimates compared to rNLS estimates. The bisquare RMS error was 0.047 when using the mean prediction from the 40 MLP networks, and 0.055 for a randomly chosen MLP network. The rNLS approach produced a minimum bisquare RMS error of 0.094. The ML approach displayed negligible proportional bias in OEF estimates (slope of true vs. estimated values = 0.982), whereas rNLS estimates had variable levels of bias depending on the level of regularization, see figure 3a for a summary of the results. As expected from the OEF results, ML estimates of CMRO<sub>2</sub> also had significantly reduced error and bias compared to the rNLS implementation. The proportional bias for the ML implementation was 0.977 compared to a minimum bias of 0.913 for the rNLS method. The bisquare RMS error in CMRO<sub>2</sub> estimates for the ML implementation was 20.3  $\mu\text{mol}/100\text{g}/\text{min}$  (22.6 for an individual MLP network) whereas the error for rNLS estimates ranged from 29.6 to 52.4  $\mu\text{mol}/100\text{g}/\text{min}$  depending on the level of bias (with greater bias coinciding with reduced error), see figure 3b.

Training of the MLP with reduced feature vectors (excluding the BOLD data) or limited respiratory stimuli (excluding either CO<sub>2</sub> or O<sub>2</sub> modulation) highlights the importance of each signal and stimulus in estimate the rate of oxygen consumption. As expected, removing the BOLD signal resulted in a significant reduction in the network's ability to estimate CMRO<sub>2</sub> (validation  $R^2$  reduced from 0.923 for the full model to 0.58). In this instance there should be no information relating to OEF in the feature vector and so the inference is based solely on the correlation between baseline flow and CMRO<sub>2</sub> in the simulated data. Adding the BOLD data back in but with only an O<sub>2</sub> stimulus does little to improve the performance of the network ( $R^2 = 0.63$ ). This is not unexpected as the hyperoxic BOLD signal is largely related to venous blood volume (Blockley et al., 2013) with little influence from OEF. Perhaps unexpectedly, including the CO<sub>2</sub> stimulus but not the O<sub>2</sub> stimulus significantly improves the ability of the network to infer resting CMRO<sub>2</sub> ( $R^2 = 0.71$ ). While this is still significantly worse than the full model, it suggests that some quantitative metabolic information may be extracted from hypercapnic calibration studies that are normally employed to estimate relative changes in CMRO<sub>2</sub> (Hoge, 2012). Additionally, such results suggest that the simulation framework could be utilized to optimize data acquisition by designing respiratory stimuli that maximize the performance of the ML implementation, and that such respiratory paradigms may be different compared to those for standard analysis methods (which are unable to infer resting CMRO<sub>2</sub> information from a hypercapnic calibration experiment).

### 5.2 In-vivo

Due to the limited availability and technical challenges associated with acquiring 15-oxygen PET data for CMRO<sub>2</sub> mapping (the gold standard approach) it is difficult to directly validate the *in-vivo*

248 results obtained in this study. However, a number of fundamental relationships between resting  
249 physiological parameters have consistently been observed across groups of healthy individuals. Here  
250 we compare these observed relationships against the acquired data to infer the relative error and bias  
251 for each analysis method. One of the most frequently reported relationships in the healthy human  
252 brain is that resting blood flow is linearly correlated with resting oxygen metabolism (Coles et al.,  
253 2006; Lebrun-Grandie et al., 1983; Leenders et al., 1990; Powers et al., 2011; Scheinberg and Stead,  
254 1949). Additionally, PET data suggests that the OEF should be approximately uniform across the  
255 cerebral grey matter e.g. (Hyder et al., 2016). Thus, we can use the coefficient of variation (COV) of  
256 grey matter OEF estimates as an indicator of parameter error, and examine the variation in the slope  
257 of the CBF-CMRO<sub>2</sub> relationship to infer the proportional bias or sensitivity to physiological variation  
258 of CMRO<sub>2</sub> estimates.

259 As in the simulation experiments we investigated the *in-vivo* analysis for varying levels of  
260 regularization in the rNLS analysis and compare this to the ML results. Figure 4b plots the COV in  
261 OEF estimates for increasing levels of regularization against the slope of the CBF-CMRO<sub>2</sub> regression  
262 (normalized by the slope of the ML estimate). As predicted by the simulations, the slopes of the ML  
263 estimates and the rNLS estimates are similar when little regularization is applied, with the slope of  
264 the rNLS estimates slightly reduced compared to the ML approach. As more regularization is applied  
265 the COV of OEF estimates is reduced and the slope between CBF and CMRO<sub>2</sub> decreases, clearly  
266 demonstrating the trade-off between variance and bias. Again, as predicted by the simulations, the  
267 COV in ML estimates is significantly less than COV in rNLS estimates for a similar CBF-CMRO<sub>2</sub>  
268 slope.

269 To investigate the bias in OEF estimates we take advantage of another physiological relationship  
270 reported in the literature; cerebral oxygen extraction is inversely related to [Hb] (Ibaraki et al., 2010)  
271 and the closely related parameter Hct (Morris et al., 2018). Taking the same approach as before we  
272 observe *in-vivo* results that closely match predictions from the simulation, see figure 4a. As in the  
273 simulations, the slope in the [Hb]-OEF relationship is similar between the ML method and rNLS  
274 approach for a moderate amount of regularization. However, the slope is substantially increased  
275 when using minimal regularization, and reduced when applying strong regularization.

276 Figure 5 shows scatter plots of the grey matter CBF-CMRO<sub>2</sub> and [Hb]-OEF relationships observed  
277 with the ML and rNLS methods across the 30 healthy volunteers studied. The rNLS results are  
278 shown for a single level of regularization, where the slope of the [Hb]-OEF relationship most closely  
279 matches that of the ML analysis (see figure 4). The coefficient of determination is greater for the ML  
280 approach for each relationship, with  $R^2$  values of 0.56 and 0.35 for the CBF-CMRO<sub>2</sub> and [Hb]-OEF  
281 relationships, compared to 0.34 and 0.14 for the rNLS approach ( $p < 0.05$  for all correlations).

282 Table 3 reports the results of a bivariate analysis of [Hb] against OEF and CBF for both analysis  
283 methods. The slopes of the relationship between OEF and [Hb] are similar to that reported in healthy  
284 subjects by (Ibaraki et al., 2010), -1.75 Hb (g/dL). As per Ibaraki et al. the relationship between CBF  
285 and OEF did not reach significance ( $p = 0.44$ ) for the ML approach, however a significant negative  
286 correlation was observed in the rNLS analysis ( $p = 0.005$ ). A univariate analysis of CMRO<sub>2,0</sub> against  
287 CBF<sub>0</sub> is consistent with that observed in healthy controls by (Powers et al., 2011) ( $\beta_1 = 0.2$ ) for both  
288 analysis methods,  $\beta_1 = 0.32$  ( $p < 0.001$ ) and  $\beta_1 = 0.24$  ( $p < 0.001$ ) for the ML and rNLS approaches  
289 respectively.

290 Figure 6 shows a comparison between CBF<sub>0</sub>, OEF<sub>0</sub> and CMRO<sub>2,0</sub> parameter maps calculated with the  
291 ML method (single MLP network and ensemble of 40 networks) and the rNLS method. The image

shows 7 slices from a single subject, which have been interpolated for display using cubic b-spline interpolation (Ruijters and Thevenaz, 2012) using FSleyes (10.5281/zenodo.1470761). As expected OEF<sub>0</sub> is not well estimated in the white matter, due to the T<sub>1</sub> decay of the arterial spin labeling signal and the longer arrival time of white matter blood. Across grey matter containing voxels maps of OEF<sub>0</sub> calculated with the ML methods are more uniform than those calculated with the rNLS approach, with the ensemble approach visibly outperforming the single network MLP estimates. These observations are consistent with the results of the simulations and the grey matter COV observed for *in-vivo* OEF<sub>0</sub> estimates. However, it is also apparent from the images that each method demonstrates sensitivity to regional susceptibility effects. For example, in the pre-frontal cortex and inferior temporal lobes the images show greater variability in OEF<sub>0</sub> estimates, with regions of both over and under-estimation apparent. This instability is likely due to reduced BOLD SNR in these locations and alteration of the susceptibility of air in and around the nasal cavity and paranasal sinuses due to modulation of the inspired oxygen content during data acquisition. It is clear that the ML estimates, in particular those made from the ensemble of MLPs, are more robust to such regional susceptibility effects.

The *in-vivo* analysis also highlights the improvement in computational efficiency of the proposed method. The rNLS approach took approximately 20 minutes to analyze a complete dataset on a standard laptop (2.8 Ghz Intel Core i7, 16GB memory), while the ML approach was able to complete the same analysis in approximately 10 to 20 seconds (depending on the number of networks in the ensemble of MLP regressors).

## 6 Discussion and Conclusions

Instability in parameter estimates made using noisy *in-vivo* data may be reduced by incorporating prior knowledge of physiological parameters, e.g. (Chappell et al., 2010; Frau-Pascual et al., 2014; Germuska et al., 2016; Mesejo et al., 2015). Previous investigation of such methods (Germuska et al., 2016) suggests that they are an effective means to increase the robustness of CMRO<sub>2</sub> estimates made with dc-fMRI. However, these methods are computationally expensive and must necessarily make a trade off between parameter uncertainty and parameter sensitivity. Thus, they are not well suited to high throughput or rapid data analysis and care must be taken when using such methods not to unduly bias parameter estimates towards the priors. In the work presented here we take a different approach by training a machine learning implementation that is robust to input noise. Given an appropriately selected (or generated) training dataset, a well-implemented solution will be unbiased, robust, and have a low computational overhead.

Computer modeling suggests that the proposed method outperforms previous analysis methods both in terms of uncertainty and bias. *In-vivo* data supports the predicted improvement in uncertainty with a significant reduction in the COV of grey matter OEF<sub>0</sub> estimates when compared to a regularized non-linear least squares fitting of the data. Additionally, agreement was found between the predicted behaviors of each method and their associated biases when compared to reported physiological relationships. Qualitatively, the *in-vivo* parameter maps suggest that the ML approach, especially when paired with an ensemble implementation, is more robust to physiological noise; producing physiologically plausible parameter estimates in challenging brain regions, e.g. near the frontal sinuses. Such physiological noise was not modeled in the training data so it is perhaps unexpected that the ML method is robust to these noise sources. However, it is plausible that the discriminative features identified from the frequency-domain representation of the data during training are less sensitive to these regional susceptibility changes than a traditional time-domain fit of the data. It is possible that this aspect of the ML approach could be enhanced by extending the training data to



337 include such regional susceptibility changes, either on their own or in combination with a spatially  
338 informed approach to data fitting.

339 The use of an ensemble of MLP networks reduced parameter uncertainty in simulation and reduced  
340 the coefficient of variation in grey matter OEF<sub>0</sub> estimates *in-vivo*, demonstrating its utility in this  
341 application. However, it is anticipated that enforcing network diversity during training could make  
342 further improvements in performance. As it has previously been demonstrated that, in the presence  
343 of noise, the performance of an ensemble of networks can always be improved by explicitly  
344 encouraging diversity during training (Reeve and Brown, 2018).

345 The machine learning implementation presented here employs a combination of proven signal  
346 processing (time-frequency transformation) and machine learning methods (decision trees and fully  
347 connected artificial neural networks) that have been shown to select appropriate features for learning  
348 and are robust to input noise. The proposed analysis pipeline demonstrates an improvement in both  
349 the accuracy and precision in parameter estimates compared to published methods, and is appropriate  
350 for the study of both healthy volunteers and in clinical investigations. However, there are still many  
351 avenues that could be explored both in terms of signal processing and machine-learning. For example  
352 time domain data could be converted to 2D time-frequency representations such as a spectrogram, or  
353 into spectrogram-like representations using wavelet transforms (for increased time resolution). This  
354 type of pre-processing would open the door to the application of 2D convolution neural networks  
355 (CNN) that have been so successfully applied in the domain of image processing. It is possible that  
356 the application of such approaches could further improve the performance of machine learning when  
357 analyzing dc-fMRI data. However, a thorough investigation of all available machine learning  
358 methods and associated pre-conditioning of the data is beyond the scope of the current study, which  
359 focuses instead on the realization of a practical solution by combining well-proven techniques for the  
360 analysis of signal data.

361 All *in-vivo* analysis in this manuscript is performed in the absence of spatial smoothing, which is  
362 often employed to improve statistical estimates made from fMRI data (Friston et al., 1995). We chose  
363 not to employ spatial smoothing in this analysis for two principle reasons: first any such spatial  
364 filtering implies a prior assumption regarding the spatial extent of any variation (Rosenfeld and Kak,  
365 1982), and can thus lead to unwanted loss of sensitivity to physiological variation; second we did not  
366 want to increase the potential contamination of grey matter voxels with non-tissue signals, such as  
367 CSF or macrovessels (both of which are not included in the underlying signal model). The current  
368 study does not make any direct comparison between smoothed and unsmoothed analysis pipelines,  
369 however the presented method clearly avoids any possible smoothing artefacts that might otherwise  
370 bias the analysis.

371 A limitation of the proposed method is the need to train new regressors for a given gas paradigm and  
372 set of acquisition parameters, e.g. arterial spin labeling tagging duration, repetition time and duration  
373 of the acquisition. In addition, there is a requirement that the *in-vivo* gas manipulation does not  
374 deviate significantly from the range of simulated designs. While it is a relatively straightforward  
375 process to retrain the regressors with a new set of parameters, to match the local acquisition protocol,  
376 the scope of the method could be increased if individualized gas traces could be incorporated into the  
377 training data; allowing a single pre-trained implementation to be applied across studies.

378 The simulations and *in-vivo* results suggest that the proposed analysis method could significantly  
379 increase the utility of dc-fMRI, reducing the number of participants needed to detect a group  
380 difference in oxygen metabolism or oxygen extraction fraction and offering more physiological

interpretability of metabolic differences or alteration due to a stimulus. In addition, the significant reduction in processing time and the improved robustness of the individual parameter maps reduces two of the hurdles restricting clinical implementation of such techniques.

## Tables

| OEF         | CBF<br>(ml/100g/min) | [Hb]<br>(g/dL) | Mean capillary transit<br>time<br>(CBV <sub>cap</sub> / CBF, seconds) | PminO <sub>2</sub><br>(mmHg) | Cerebral Vascular<br>Reactivity<br>(% CBF / mmHg CO <sub>2</sub> ) | K           |
|-------------|----------------------|----------------|-----------------------------------------------------------------------|------------------------------|--------------------------------------------------------------------|-------------|
| 0.05 – 0.75 | 1 – 250              | 10-18          | 0.25 – 4.0                                                            | 0 - 30                       | 1 - 7                                                              | 0.01 – 0.25 |

Table 1. Range of physiological parameters used in the dc-fMRI data simulations for training of the machine learning regressors.

| Variable / abbreviation | Expression (units)                                                         |
|-------------------------|----------------------------------------------------------------------------|
| OEF                     | Oxygen Extraction Fraction (dimensionless)                                 |
| CMRO <sub>2</sub>       | Cerebral Metabolic Rate of Oxygen consumption (μmol/100g/min)              |
| CBF                     | Cerebral Blood Flow (ml/100g/min)                                          |
| φ                       | Oxygen binding capacity of hemoglobin (1.34 ml/g)                          |
| [Hb]                    | Hemoglobin concentration (g/dL)                                            |
| CaO <sub>2</sub>        | Arterial oxygen content (ml/ml)                                            |
| PaO <sub>2</sub>        | Arterial oxygen tension (mmHg)                                             |
| SaO <sub>2</sub>        | Arterial oxygen saturation (dimensionless)                                 |
| SvO <sub>2</sub>        | Venous oxygen saturation (dimensionless)                                   |
| α                       | Grubb exponent                                                             |
| β                       | Venous morphology / deoxy-hemoglobin - BOLD exponent                       |
| BOLD                    | Blood Oxygenation Level Dependent signal                                   |
| ASL                     | Arterial Spin Labeling                                                     |
| M <sub>0blood</sub>     | Arterial blood MRI signal equilibrium magnetization (dimensionless)        |
| PLD                     | ASL post-label delay time (1.0 – 3.0 seconds)                              |
| M                       | Maximum possible BOLD signal (BOLD calibration parameter)                  |
| K                       | BOLD scaling factor = M / ([Hb] x (1-SvO <sub>2</sub> )) <sup>β</sup>      |
| D                       | Effective oxygen diffusivity of the capillary network (μmol/100g/mmHg/min) |
| CBV <sub>cap</sub>      | Capillary blood volume (ml/100g)                                           |
| PminO <sub>2</sub>      | Minimum oxygen partial pressure at the mitochondria (mmHg)                 |

|   |                                                                                     |
|---|-------------------------------------------------------------------------------------|
| h | Hill coefficient (2.8)                                                              |
| κ | Effective permeability of capillary endothelium and brain tissue (μmol/mmHg/ml/min) |

Table 2. Summary of model parameters and abbreviation used in the dc-fMRI data simulations and their definitions.

| Predictor | ML β1 (p value) | rNLS β1 (p value) |
|-----------|-----------------|-------------------|
| OEF       | -1.42 (0.001)   | -2.23 (0.001)     |
| CBF       | -0.07 (0.44)    | -0.37 (0.005)     |
| Intercept | 61.95 (<0.001)  | 89.48 (<0.001)    |

Table 3. Results of a bivariate regression of [Hb] against CBF<sub>0</sub> and OEF<sub>0</sub> grey mater estimates for 30 healthy volunteers analyzed with the ML (ensemble of MLPs) and rNLS fitting methods.

## 7 Conflict of Interest

Author FF was employed by company Siemens Healthcare Ltd. All other authors declare no competing interests.

## 8 Author Contributions

MG. Wrote the manuscript, developed and implemented the methods, and analysed the in-vivo data.

HC. Acquired and processed data and edited the manuscript.

TO. Created and provided code used in the prototype pseudo-continuous arterial spin labeling pulse sequence.

FF. Assisted in the implementation of the prototype arterial spin labeling pulse sequence.

VT. Chief investigator overseeing study design and data collection for a subset of healthy controls.

KM. Principal investigator overseeing study design and data collection for a subset of healthy controls.

RW. Principal investigator overseeing study design and data collection for a subset of healthy controls

All authors reviewed and edited the manuscript prior to submission.

## 9 Funding

Wellcome Strategic Award, ‘Multi-scale and multi-modal assessment of coupling in the healthy and diseased brain’, grant reference 104943/Z/14/Z (RW, MG, HC). RW is also supported by the Higher Education Funding Council for Wales. KM is supported by Wellcome grant 200804/Z/16/Z. TO is

411 supported by the Royal Academy of Engineering and Wellcome Centre for Integrative Neuroimaging  
412 is supported by core funding from Wellcome (203139/Z/16/Z).

## 413 **10 Acknowledgments**

414 We would like to thank Wellcome for supporting this work: Wellcome Strategic Award, ‘Multi-scale  
415 and multi-modal assessment of coupling in the healthy and diseased brain’, grant reference  
416 104943/Z/14/Z.

## 417 **Data Availability Statement**

418 The python code for the machine learning implementation proposed in this manuscript can be found  
419 in the fml\_pMRI repository <https://zenodo.org/badge/latestdoi/189416118>. We do not have ethical  
420 consent to make the *in-vivo* datasets acquired for this study publically available.

421

422



## References

- Alsop, D.C., Detre, J.A., Golay, X., Gunther, M., Hendrikse, J., Hernandez-Garcia, L., Lu, H., MacIntosh, B.J., Parkes, L.M., Smits, M., van Osch, M.J., Wang, D.J., Wong, E.C., Zaharchuk, G., 2015. Recommended implementation of arterial spin-labeled perfusion MRI for clinical applications: A consensus of the ISMRM perfusion study group and the European consortium for ASL in dementia. *Magn Reson Med* 73, 102-116.
- Bernier, J.L., Ortega, J., Ros, E., Rojas, I., Prieto, A., 1999. A new measurement of noise immunity and generalization ability for MLPs. *Int J Neural Syst* 9, 511-521.
- Blockley, N.P., Griffeth, V.E., Germuska, M.A., Bulte, D.P., Buxton, R.B., 2013. An analysis of the use of hyperoxia for measuring venous cerebral blood volume: comparison of the existing method with a new analysis approach. *Neuroimage* 72, 33-40.
- Breiman, L., 2001. Random forests. *Machine Learning* 45, 5-32.
- Bulte, D.P., Kelly, M., Germuska, M., Xie, J., Chappell, M.A., Okell, T.W., Bright, M.G., Jezzard, P., 2012. Quantitative measurement of cerebral physiology using respiratory-calibrated MRI. *Neuroimage* 60, 582-591.
- Chappell, M.A., MacIntosh, B.J., Donahue, M.J., Gunther, M., Jezzard, P., Woolrich, M.W., 2010. Separation of macrovascular signal in multi-inversion time arterial spin labelling MRI. *Magn Reson Med* 63, 1357-1365.
- Coles, J.P., Fryer, T.D., Bradley, P.G., Nortje, J., Smielewski, P., Rice, K., Clark, J.C., Pickard, J.D., Menon, D.K., 2006. Intersubject variability and reproducibility of 15O PET studies. *J Cereb Blood Flow Metab* 26, 48-57.
- De Vis, J.B., Petersen, E.T., Bhogal, A., Hartkamp, N.S., Klijn, C.J., Kappelle, L.J., Hendrikse, J., 2015. Calibrated MRI to evaluate cerebral hemodynamics in patients with an internal carotid artery occlusion. *J Cereb Blood Flow Metab* 35, 1015-1023.
- Frackowiak, R.S., Herold, S., Petty, R.K., Morgan-Hughes, J.A., 1988. The cerebral metabolism of glucose and oxygen measured with positron tomography in patients with mitochondrial diseases. *Brain* 111 ( Pt 5), 1009-1024.
- Frackowiak, R.S., Lenzi, G.L., Jones, T., Heather, J.D., 1980. Quantitative measurement of regional cerebral blood flow and oxygen metabolism in man using 15O and positron emission tomography: theory, procedure, and normal values. *J Comput Assist Tomogr* 4, 727-736.
- Frau-Pascual, A., Vincent, T., Sloboda, J., Ciuciu, P., Forbes, F., 2014. Physiologically Informed Bayesian Analysis of ASL fMRI Data. *Bayesian and Graphical Models for Biomedical Imaging. Lecture Notes in Computer Science* 8677.
- Friston, K.J., Holmes, A.P., Poline, J.B., Grasby, P.J., Williams, S.C.R., Frackowiak, R.S.J., Turner, R., 1995. Analysis of Fmri Time-Series Revisited. *Neuroimage* 2, 45-53.
- Gauthier, C.J., Desjardins-Crepeau, L., Madjar, C., Bherer, L., Hoge, R.D., 2012. Absolute quantification of resting oxygen metabolism and metabolic reactivity during functional activation using QUO2 MRI. *Neuroimage* 63, 1353-1363.
- Gauthier, C.J., Hoge, R.D., 2013. A generalized procedure for calibrated MRI incorporating hyperoxia and hypercapnia. *Hum Brain Mapp* 34, 1053-1069.
- Germuska, M., Chandler, H.L., Stickland, R.C., Foster, C., Fasano, F., Okell, T.W., Steventon, J., Tomassini, V., Murphy, K., Wise, R.G., 2019. Dual-calibrated fMRI measurement of absolute

465 cerebral metabolic rate of oxygen consumption and effective oxygen diffusivity. *Neuroimage* 184,  
466 717-728.

467 Germuska, M., Merola, A., Murphy, K., Babic, A., Richmond, L., Khot, S., Hall, J.E., Wise, R.G.,  
468 2016. A forward modelling approach for the estimation of oxygen extraction fraction by calibrated  
469 fMRI. *Neuroimage* 139, 313-323.

470 Germuska, M., Wise, R.G., 2019. Calibrated fMRI for mapping absolute CMRO<sub>2</sub>: Practicalities and  
471 prospects. *Neuroimage* 187, 145-153.

472 Geurts, P., Ernst, D., Wehenkel, L., 2006. Extremely randomized trees. *Machine Learning* 63, 3-42.

473 Gjedde, A., 2002. Cerebral blood flow change in arterial hypoxemia is consistent with negligible  
474 oxygen tension in brain mitochondria. *Neuroimage* 17, 1876-1881.

475 Hayashi, T., Watabe, H., Kudomi, N., Kim, K.M., Enmi, J., Hayashida, K., Iida, H., 2003. A  
476 theoretical model of oxygen delivery and metabolism for physiologic interpretation of quantitative  
477 cerebral blood flow and metabolic rate of oxygen. *J Cereb Blood Flow Metab* 23, 1314-1323.

478 Hertel, L., Phan, H., Mertins, A., 2016. Comparing Time and Frequency Domain for Audio Event  
479 Recognition Using Deep Learning. 2016 International Joint Conference on Neural Networks (Ijcn),  
480 3407-3411.

481 Hoge, R.D., 2012. Calibrated FMRI. *Neuroimage* 62, 930-937.

482 Hyder, F., Herman, P., Bailey, C.J., Moller, A., Globinsky, R., Fulbright, R.K., Rothman, D.L.,  
483 Gjedde, A., 2016. Uniform distributions of glucose oxidation and oxygen extraction in gray matter of  
484 normal human brain: No evidence of regional differences of aerobic glycolysis. *J Cereb Blood Flow*  
485 *Metab* 36, 903-916.

486 Ibaraki, M., Shinohara, Y., Nakamura, K., Miura, S., Kinoshita, F., Kinoshita, T., 2010.  
487 Interindividual variations of cerebral blood flow, oxygen delivery, and metabolism in relation to  
488 hemoglobin concentration measured by positron emission tomography in humans. *J Cereb Blood*  
489 *Flow Metab* 30, 1296-1305.

490 Ishii, K., Kitagaki, H., Kono, M., Mori, E., 1996. Decreased medial temporal oxygen metabolism in  
491 Alzheimer's disease shown by PET. *J Nucl Med* 37, 1159-1165.

492 Jenkinson, M., Beckmann, C.F., Behrens, T.E., Woolrich, M.W., Smith, S.M., 2012. Fsl.  
493 *Neuroimage* 62, 782-790.

494 Lajoie, I., Nugent, S., Debacker, C., Dyson, K., Tancredi, F.B., Badhwar, A., Belleville, S.,  
495 Deschaintre, Y., Bellec, P., Doyon, J., Bocti, C., Gauthier, S., Arnold, D., Kergoat, M.J., Chertkow,  
496 H., Monchi, O., Hoge, R.D., 2017. Application of calibrated fMRI in Alzheimer's disease.  
497 *Neuroimage Clin* 15, 348-358.

498 Lebrun-Grandie, P., Baron, J.C., Soussaline, F., Loch'h, C., Sastre, J., Bousser, M.G., 1983. Coupling  
499 between regional blood flow and oxygen utilization in the normal human brain. A study with positron  
500 tomography and oxygen 15. *Arch Neurol* 40, 230-236.

501 Leenders, K.L., Perani, D., Lammertsma, A.A., Heather, J.D., Buckingham, P., Healy, M.J., Gibbs,  
502 J.M., Wise, R.J., Hatazawa, J., Herold, S., et al., 1990. Cerebral blood flow, blood volume and  
503 oxygen utilization. Normal values and effect of age. *Brain* 113 ( Pt 1), 27-47.

504 Merola, A., Germuska, M.A., Murphy, K., Wise, R.G., 2018. Assessing the repeatability of absolute  
505 CMRO<sub>2</sub>, OEF and haemodynamic measurements from calibrated fMRI. *Neuroimage* 173, 113-126.

506 Merola, A., Germuska, M.A., Warnert, E.A., Richmond, L., Helme, D., Khot, S., Murphy, K.,  
507 Rogers, P.J., Hall, J.E., Wise, R.G., 2017. Mapping the pharmacological modulation of brain oxygen  
508 metabolism: The effects of caffeine on absolute CMRO<sub>2</sub> measured using dual calibrated fMRI.  
509 Neuroimage 155, 331-343.

510 Merola, A., Murphy, K., Stone, A.J., Germuska, M.A., Griffeth, V.E.M., Blockley, N.P., Buxton,  
511 R.B., Wise, R.G., 2016. Measurement of oxygen extraction fraction (OEF): An optimized BOLD  
512 signal model for use with hypercapnic and hyperoxic calibration. Neuroimage 129, 159-174.

513 Mesejo, P., Sallet, S., David, O., Bénar, C., Warnking, J.M., Forbes, F., 2015. Estimating  
514 Biophysical Parameters from BOLD Signals through Evolutionary-Based Optimization. Medical  
515 Image Computing and Computer-Assisted Intervention, Lecture Notes in Computer Science 9350.

516 Miles, K.A., Williams, R.E., 2008. Warburg revisited: imaging tumour blood flow and metabolism.  
517 Cancer Imaging 8, 81-86.

518 Mintun, M.A., Lundstrom, B.N., Snyder, A.Z., Vlassenko, A.G., Shulman, G.L., Raichle, M.E.,  
519 2001. Blood flow and oxygen delivery to human brain during functional activity: theoretical  
520 modeling and experimental data. Proc Natl Acad Sci U S A 98, 6859-6864.

521 Morris, E.A., Juttukonda, M.R., Lee, C.A., Patel, N.J., Pruthi, S., Donahue, M.J., Jordan, L.C., 2018.  
522 Elevated brain oxygen extraction fraction in preterm newborns with anemia measured using  
523 noninvasive MRI. J Perinatol 38, 1636-1643.

524 Pedregosa, F., Varoquaux, G., Gramfort, A., Michel, V., Thirion, B., Grisel, O., Blondel, M.,  
525 Prettenhofer, P., Weiss, R., Dubourg, V., Vanderplas, J., Passos, A., Cournapeau, D., Brucher, M.,  
526 Perrot, M., Duchesnay, E., 2011. Scikit-learn: Machine Learning in Python. Journal of Machine  
527 Learning Research 12, 2825-2830.

528 Powers, W.J., Videen, T.O., Markham, J., Walter, V., Perlmutter, J.S., 2011. Metabolic control of  
529 resting hemispheric cerebral blood flow is oxidative, not glycolytic. J Cereb Blood Flow Metab 31,  
530 1223-1228.

531 Reeve, H.W.J., Brown, G., 2018. Diversity and degrees of freedom in regression ensembles.  
532 Neurocomputing 298, 55-68.

533 Rosenfeld, A., Kak, A.C., 1982. Digital Picture Processing, vols. I & II. Academic Press, New York.

534 Ruijters, D., Thevenaz, P., 2012. GPU Prefilter for Accurate Cubic B-spline Interpolation. Computer  
535 Journal 55, 15-20.

536 Safar, P., 1988. Resuscitation from clinical death: pathophysiologic limits and therapeutic potentials.  
537 Crit Care Med 16, 923-941.

538 Scheinberg, P., Stead, E.A., 1949. The Cerebral Blood Flow in Male Subjects as Measured by the  
539 Nitrous Oxide Technique. Normal Values for Blood Flow, Oxygen Utilization, Glucose Utilization,  
540 and Peripheral Resistance, with Observations on the Effect of Tilting and Anxiety. J Clin Invest 28,  
541 1163-1171.

542 Sollich, P., Krogh, A., 1996. Learning with ensembles: How over-fitting can be useful. Advances in  
543 Neural Information Processing Systems 8 8, 190-196.

544 Vafaei, M.S., Gjedde, A., 2000. Model of blood-brain transfer of oxygen explains nonlinear flow-  
545 metabolism coupling during stimulation of visual cortex. J Cereb Blood Flow Metab 20, 747-754.

546 Verweij, B.H., Amelink, G.J., Muizelaar, J.P., 2007. Current concepts of cerebral oxygen transport  
547 and energy metabolism after severe traumatic brain injury. Prog Brain Res 161, 111-124.

- 548 Wise, R.G., Harris, A.D., Stone, A.J., Murphy, K., 2013. Measurement of OEF and absolute  
549 CMRO<sub>2</sub>: MRI-based methods using interleaved and combined hypercapnia and hyperoxia.  
550 Neuroimage 83, 135-147.
- 551 Yue, J.B., Feng, H.K., Yang, G.J., Li, Z.H., 2018. A Comparison of Regression Techniques for  
552 Estimation of Above-Ground Winter Wheat Biomass Using Near-Surface Spectroscopy. Remote  
553 Sensing 10.

554



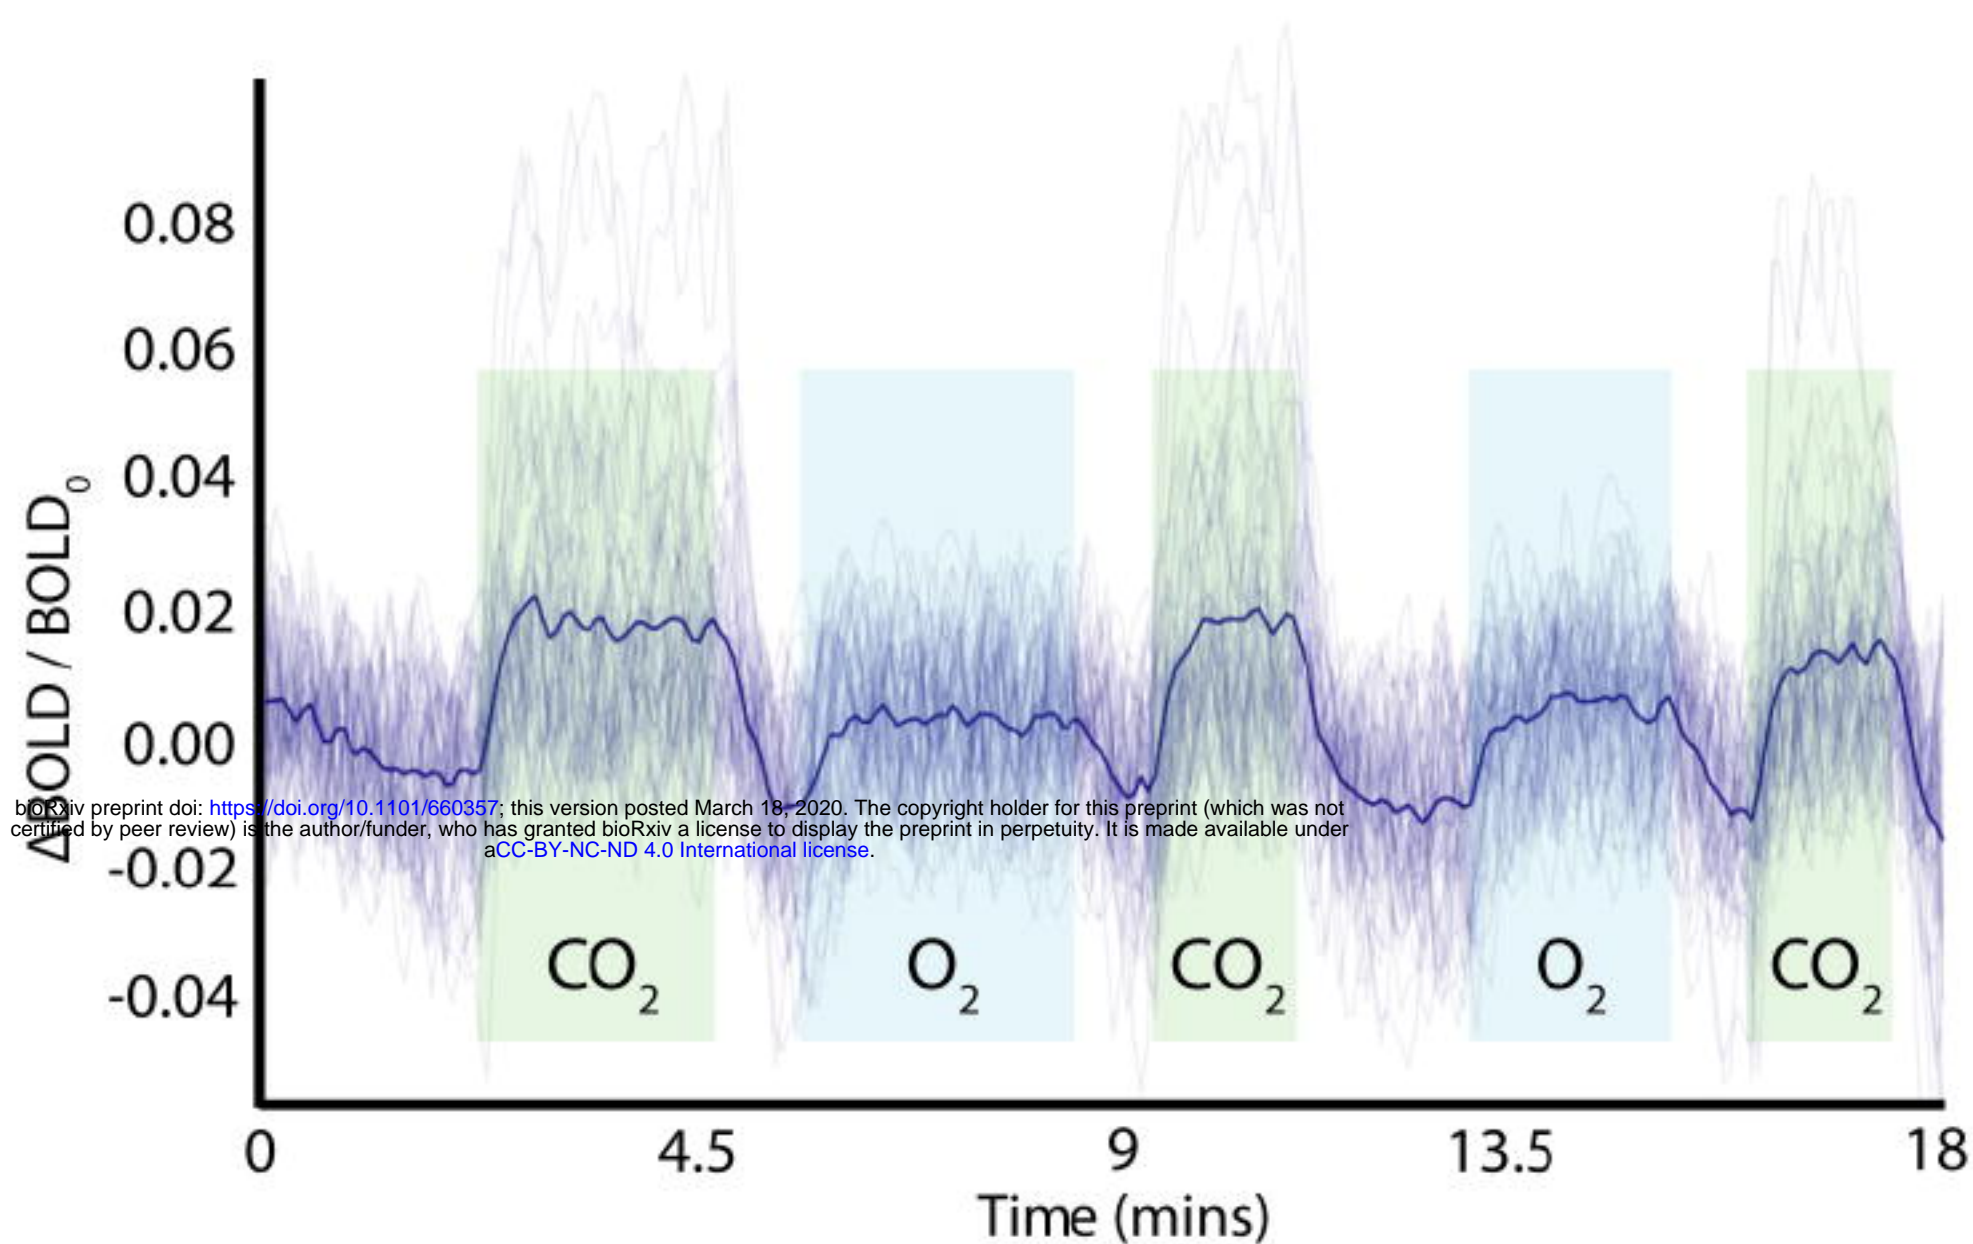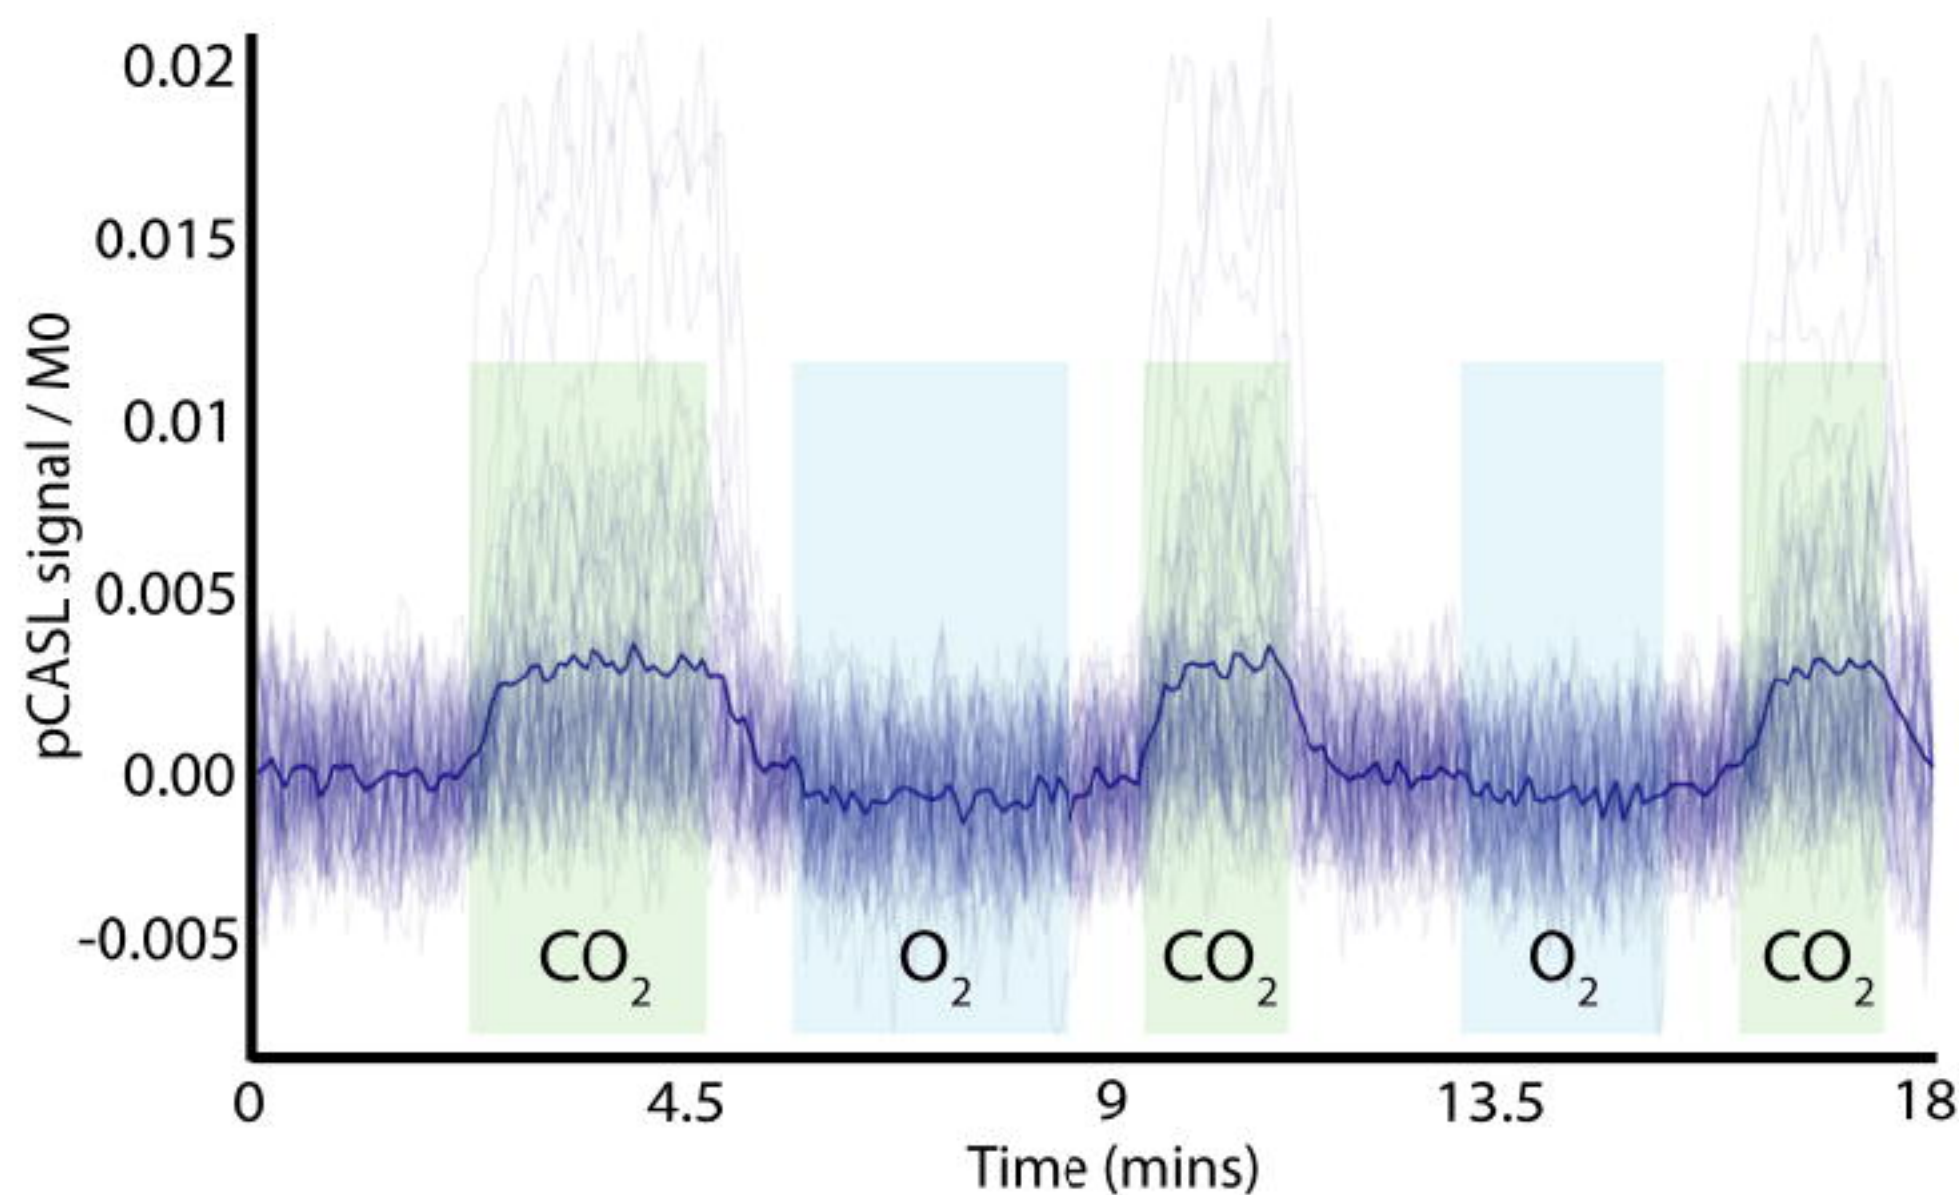

Figure 1. Example of simulated time-domain data (BOLD and ASL) with added noise and variation in physiological parameters, showing periods of hypercapnic (green) and hyperoxic (light blue) stimuli. The dark blue line represents the mean time-course over the example time series. Note the pCASL signal is normalised by the equilibrium magnetisation of arterial blood ( $M_0$ ) and has the baseline signal subtracted for display purposes.

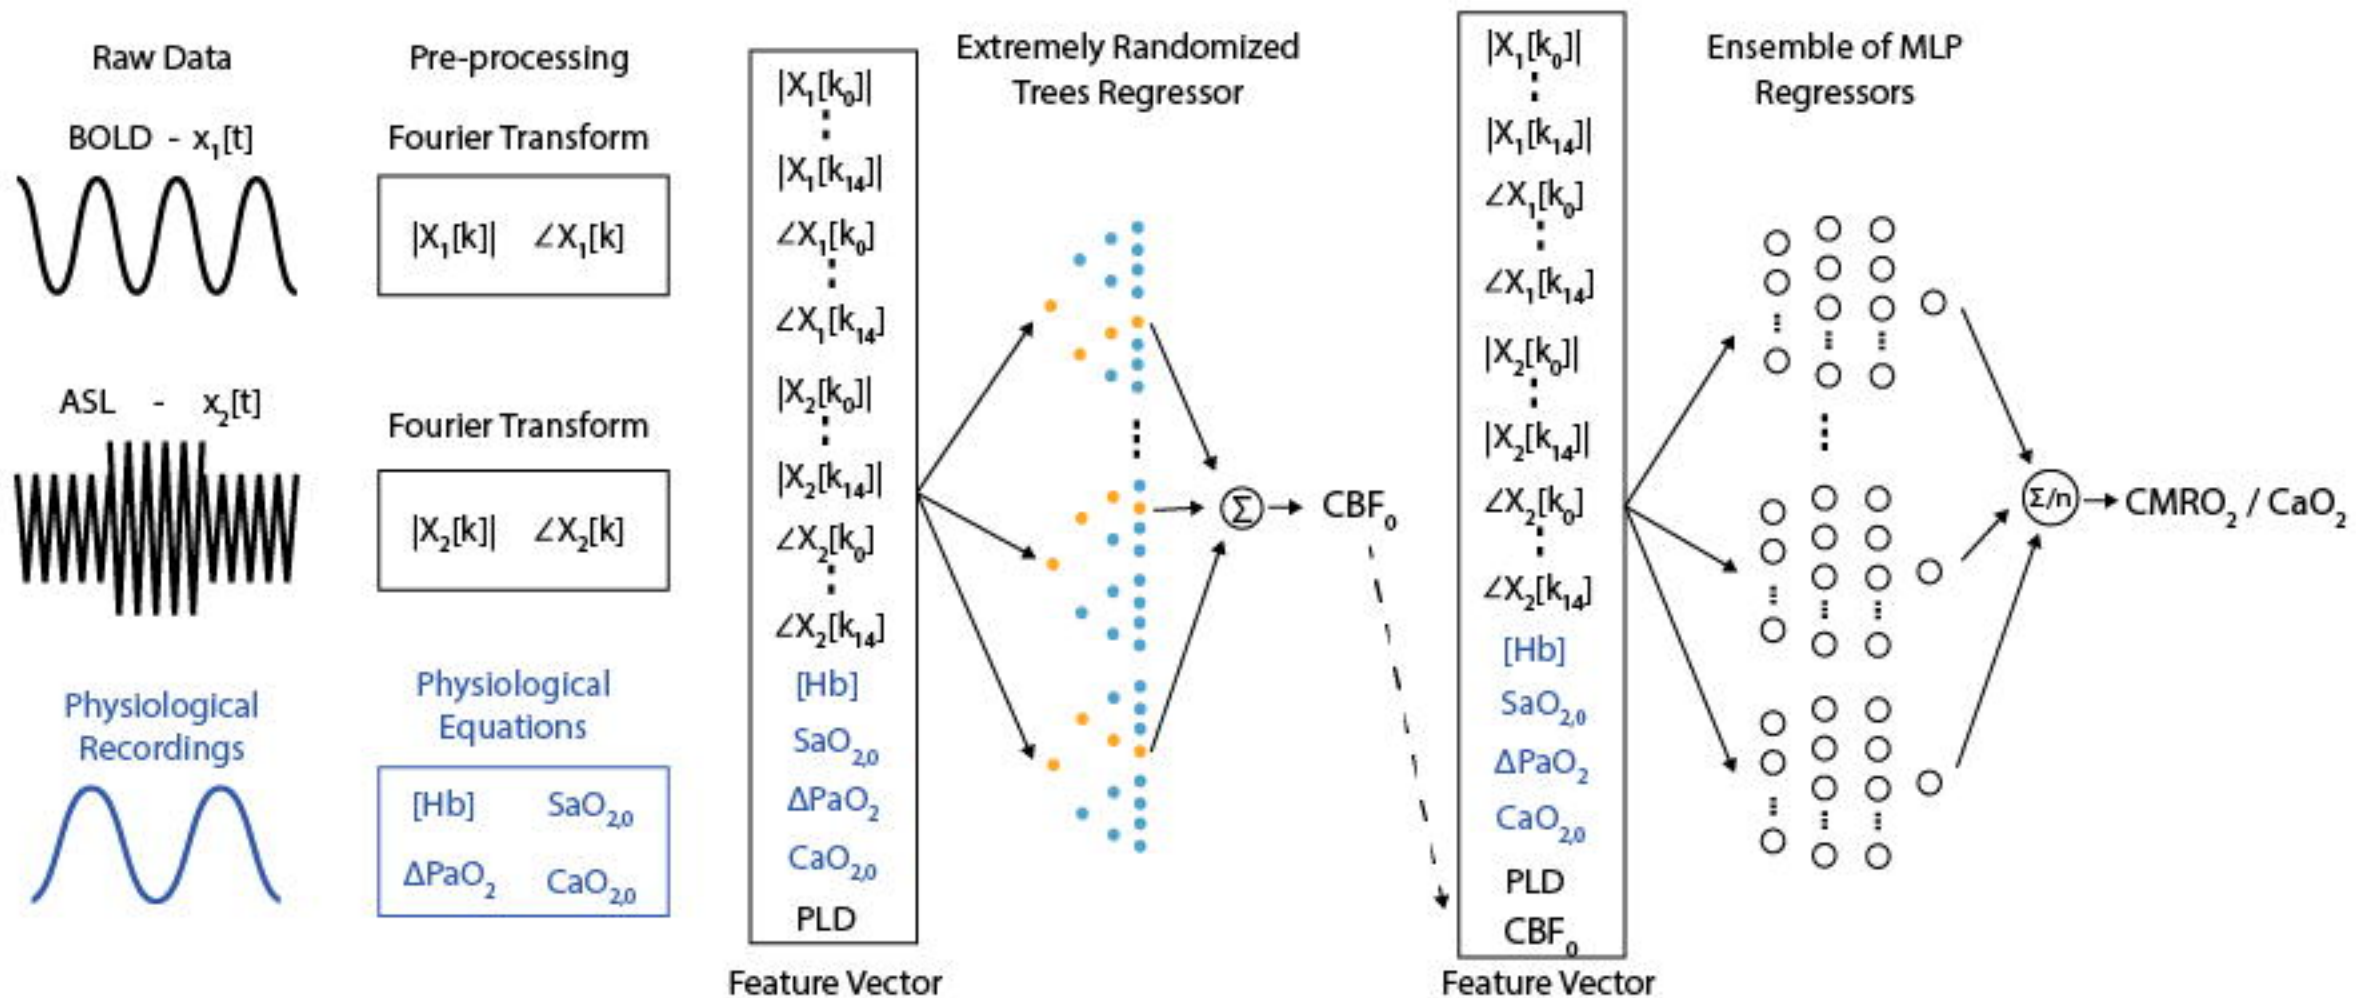

Figure 2. Schematic diagram of the frequency-domain machine learning pipeline. Raw data is pre-processed prior to the construction of a feature vector. This initial feature vector is used to estimate baseline perfusion. The perfusion estimate is then included in the feature vector fed into an ensemble of multilayer perceptron networks used to estimate the resting rate of oxygen metabolism.



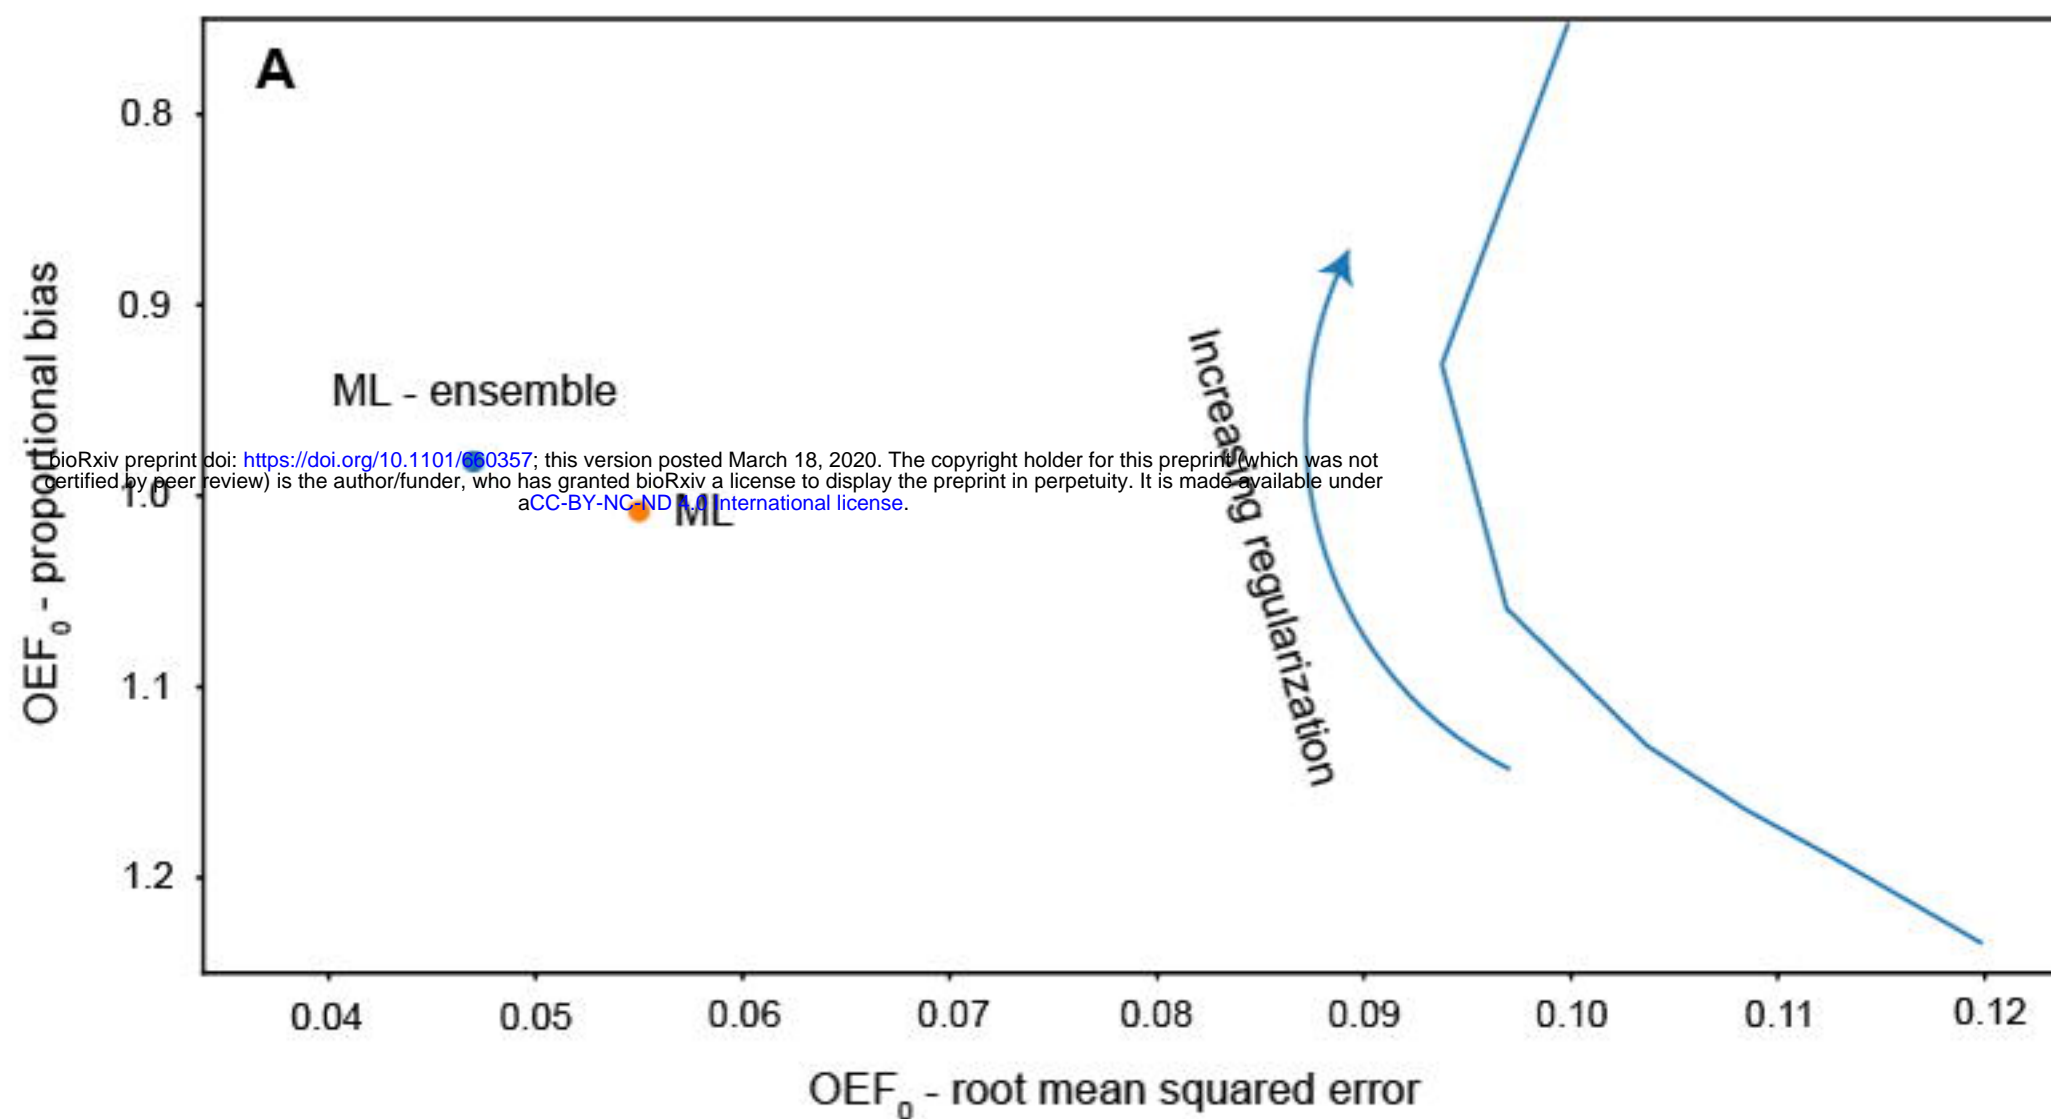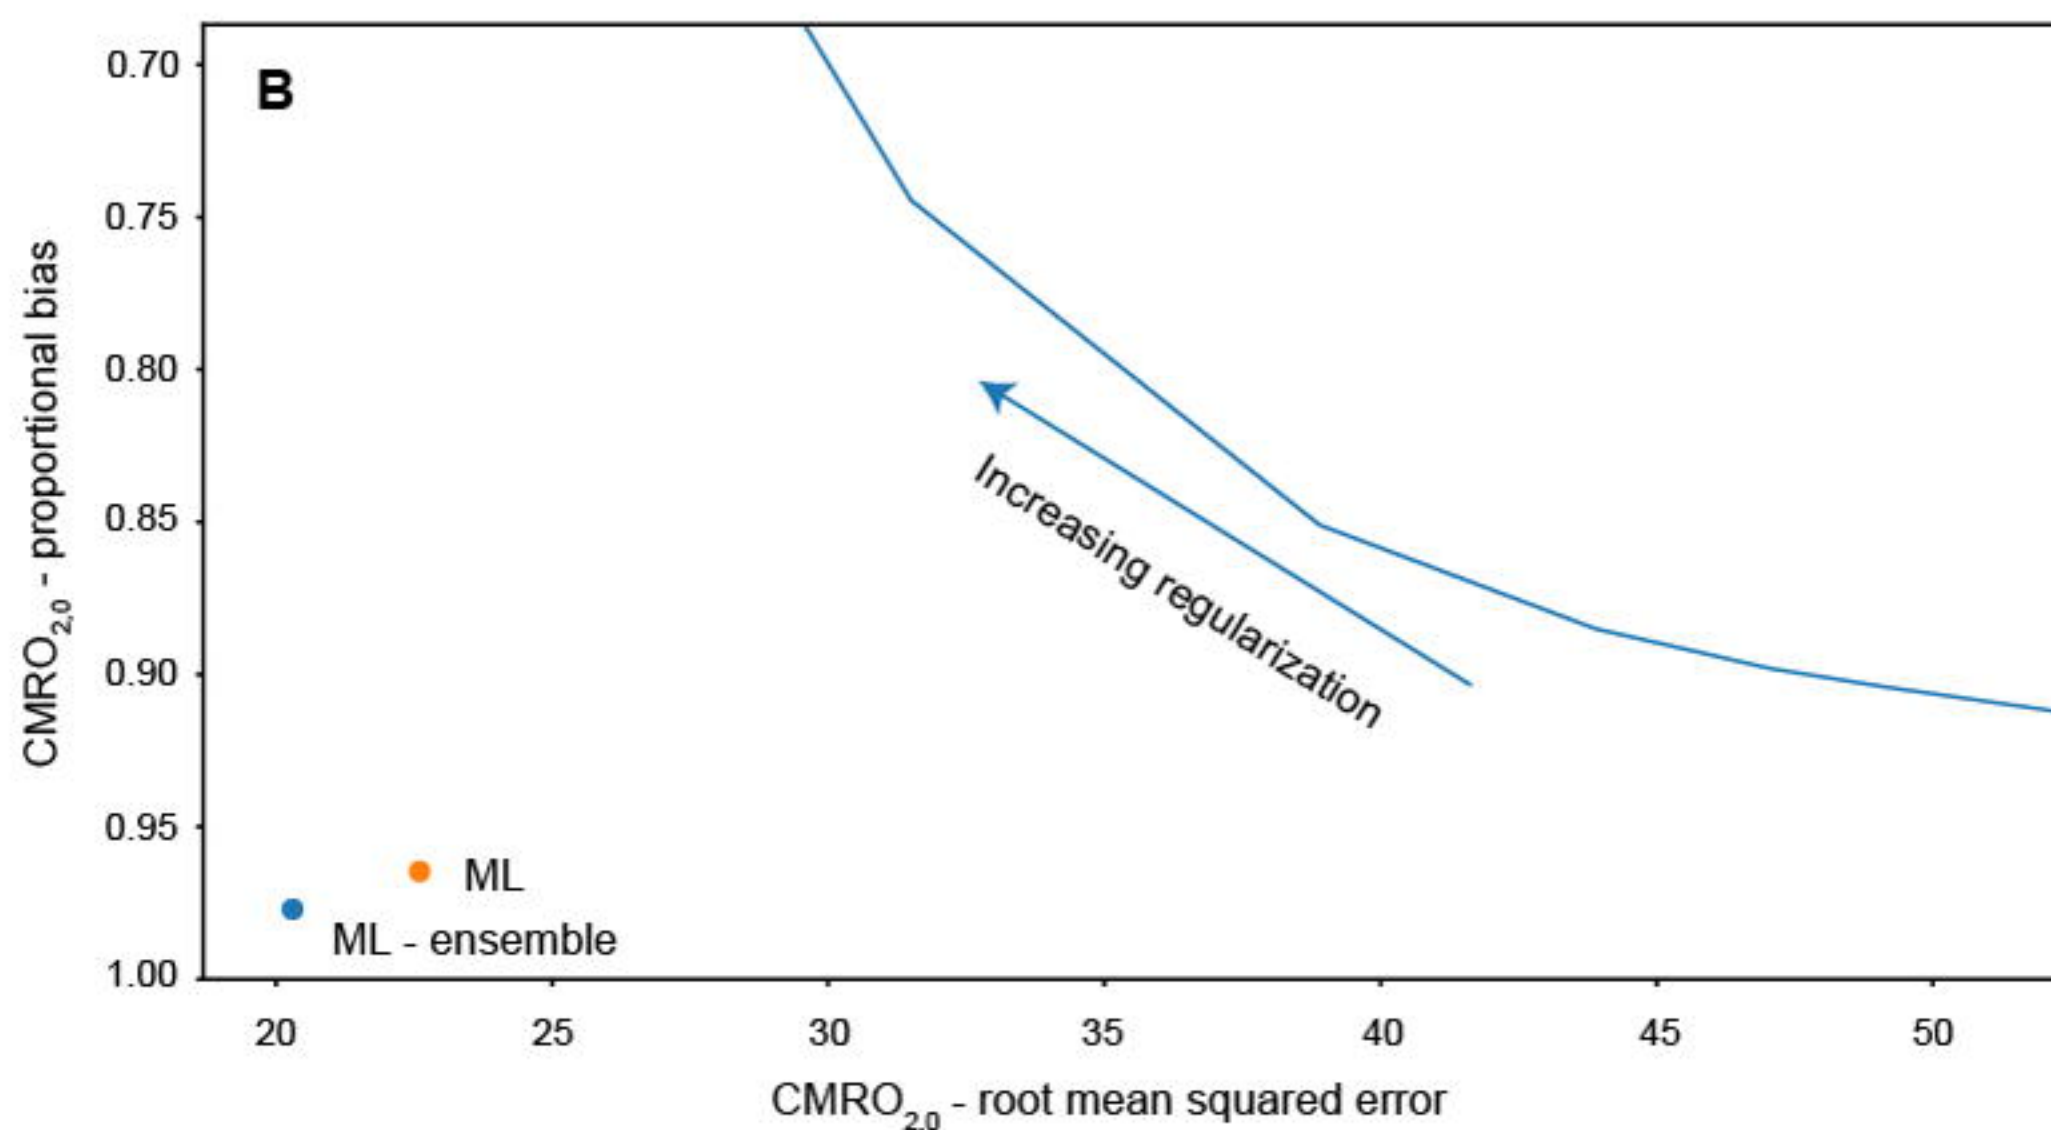

Figure 3. Root mean squared error and proportional bias in OEF<sub>0</sub> (A) and CMRO<sub>2,0</sub> (B) estimates for each analysis method fitting to simulated data (5000 simulations). Solid blue line plots the error and bias for increasing regularization weighting for the regularized non-linear least squares analysis

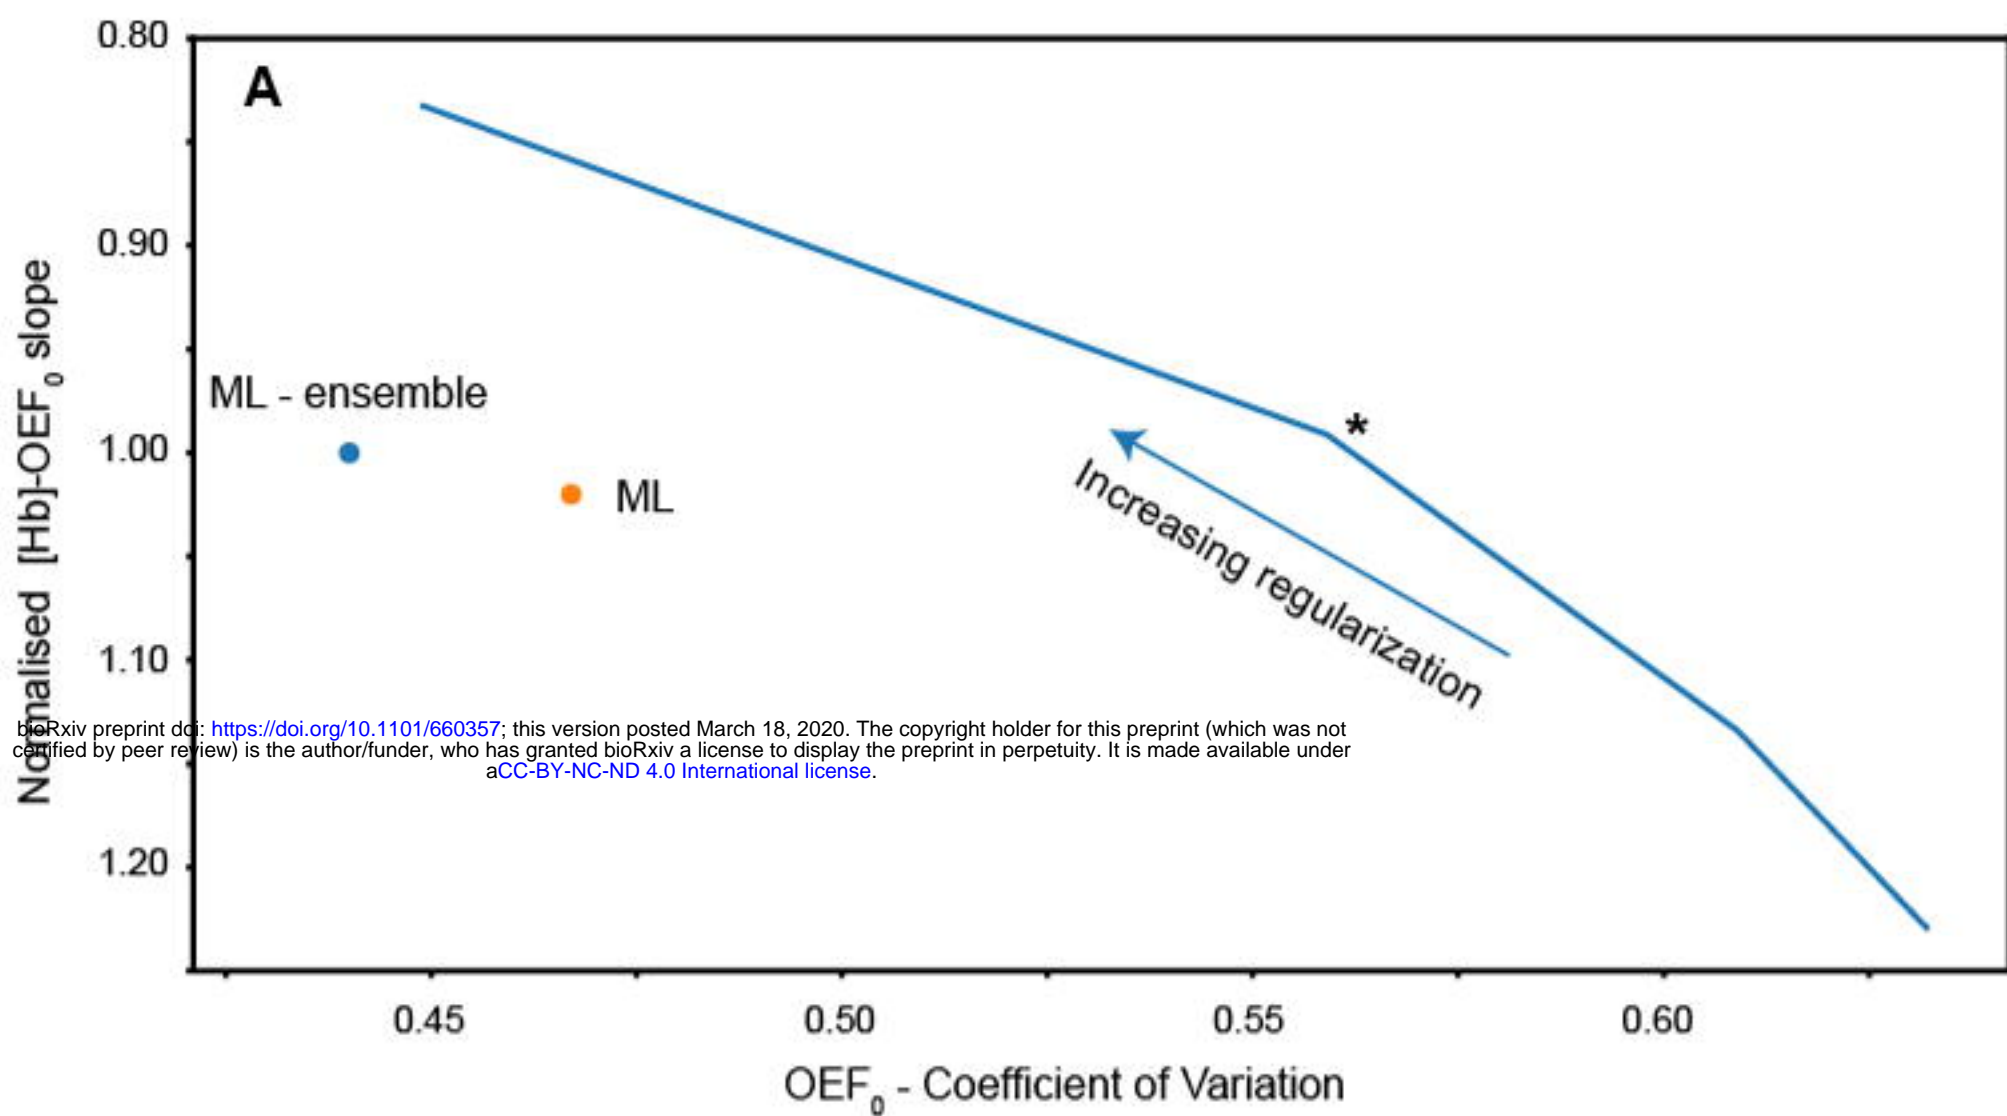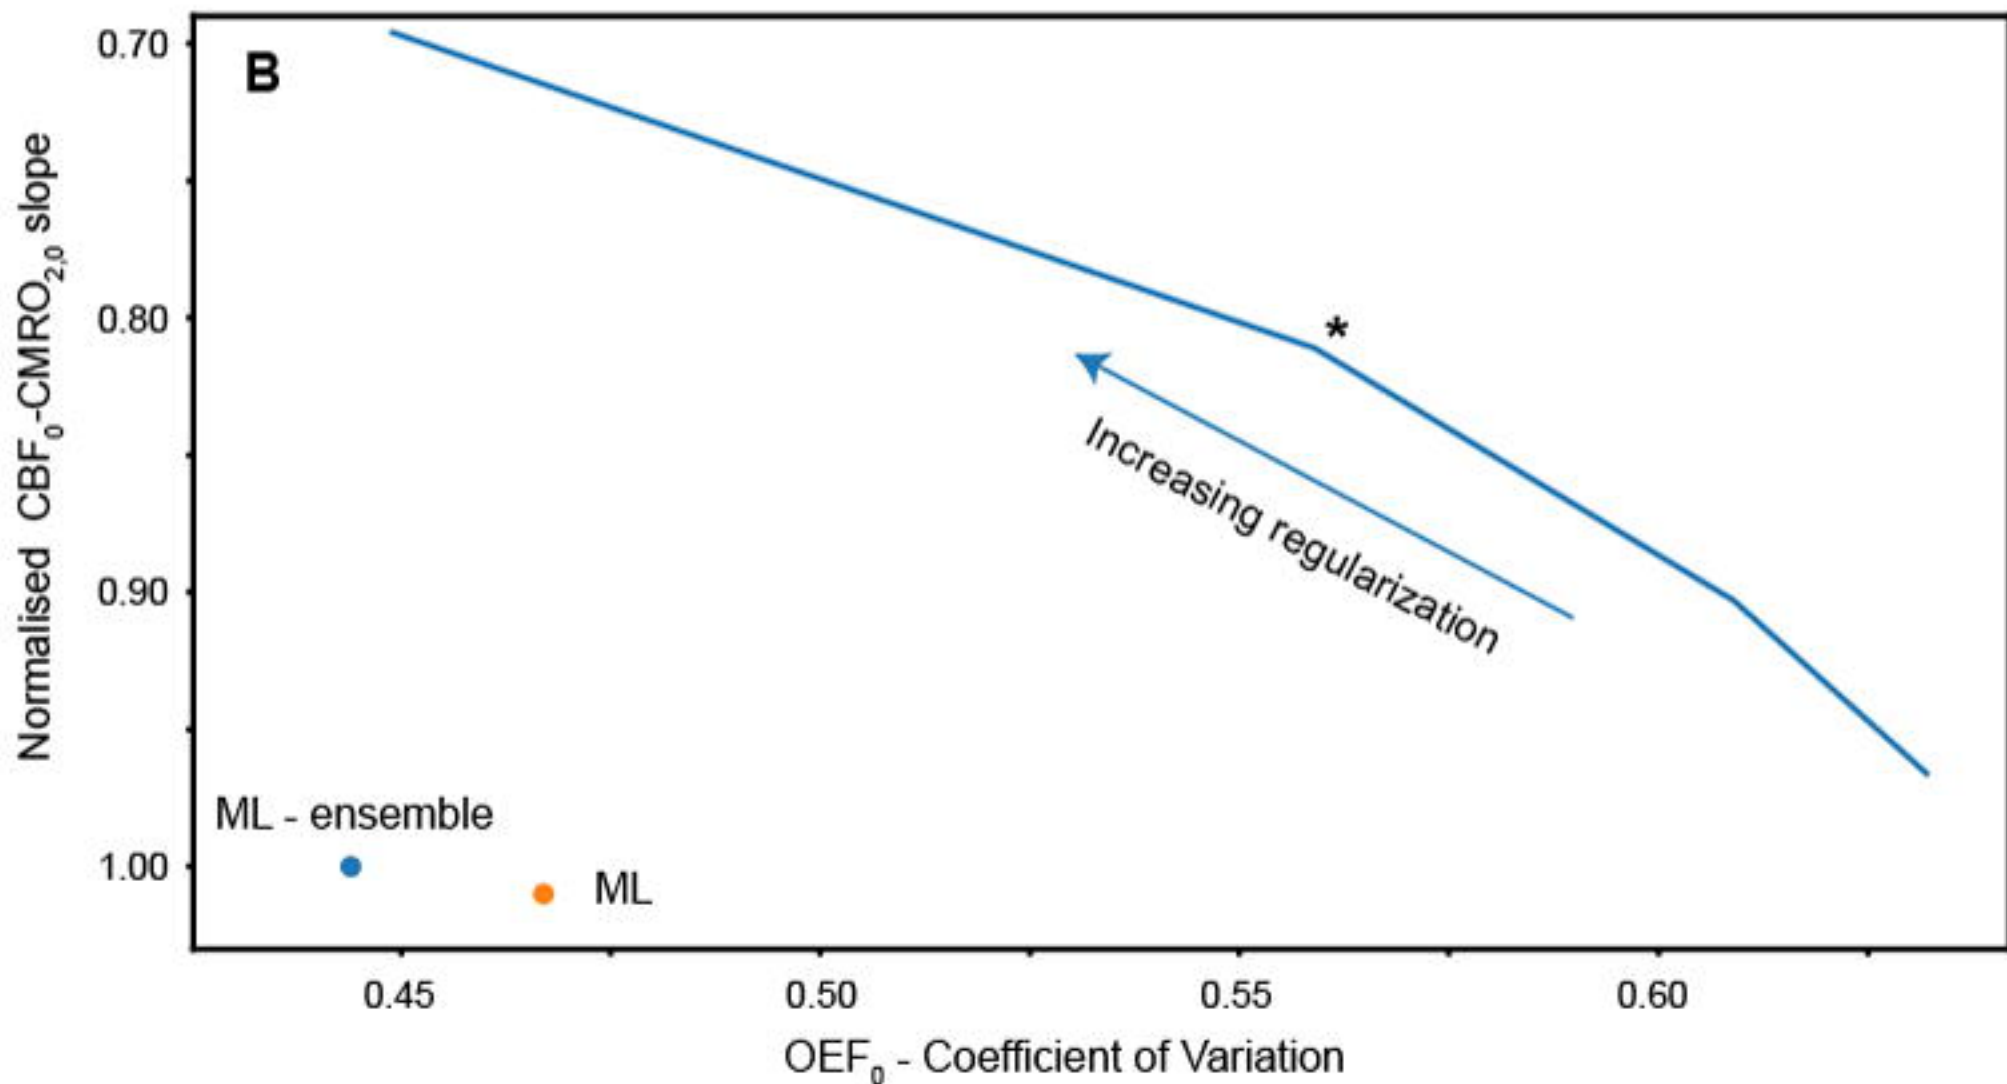

Figure 4. A. Coefficient of variation of grey matter OEF<sub>0</sub> estimates versus slope of [Hb]-OEF<sub>0</sub> relationship for each analysis method (rNLS fitting evaluated with increasing levels of regularization). The [Hb]-OEF<sub>0</sub> slope has been normalised by the ML ensemble estimate of the [Hb]-OEF<sub>0</sub> slope. B. Coefficient of variation of grey matter OEF<sub>0</sub> estimates versus the slope of the CBF-CMRO<sub>2</sub> relationship, normalised by the ML (ensemble) estimate of the CBF-CMRO<sub>2</sub> slope. Solid blue line plots the coefficient of variation against the slope for increasing regularization weighting for regularized non-linear least squares analysis. The asterisk indicates the chosen level of regularization for subsequent analysis/comparisons.



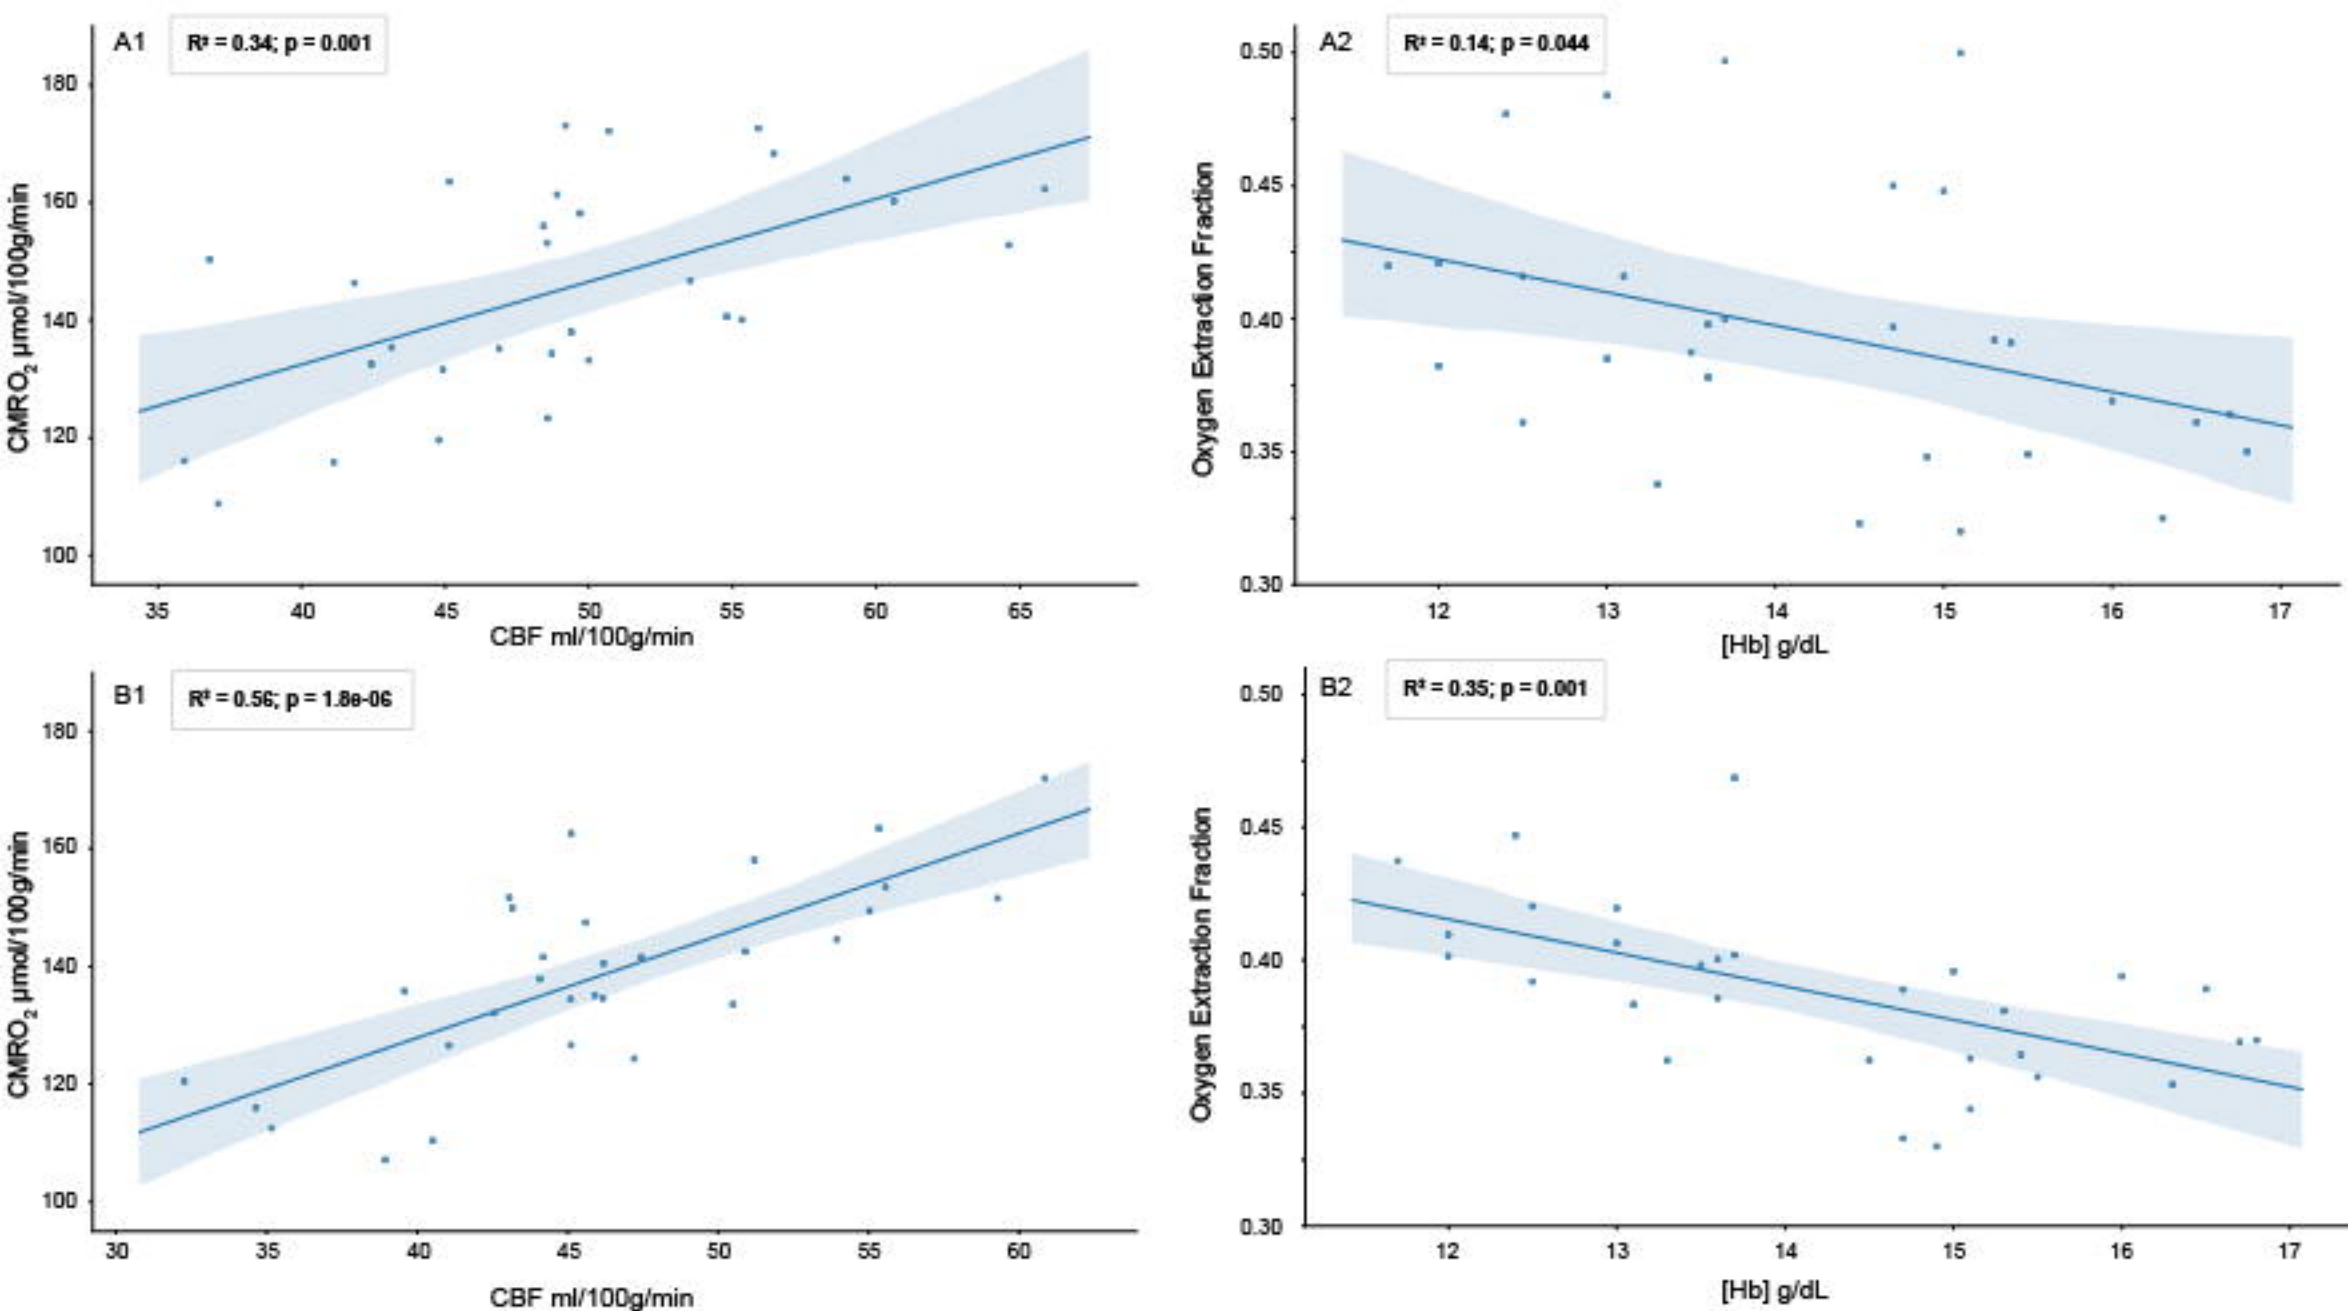

Figure 5. Scatter plots of grey matter CBF- $\text{CMRO}_2$  and [Hb]-OEF relationships observed with rNLS (A1 and A2) and ML ensemble (B1 and B2) methods across 30 healthy volunteers.



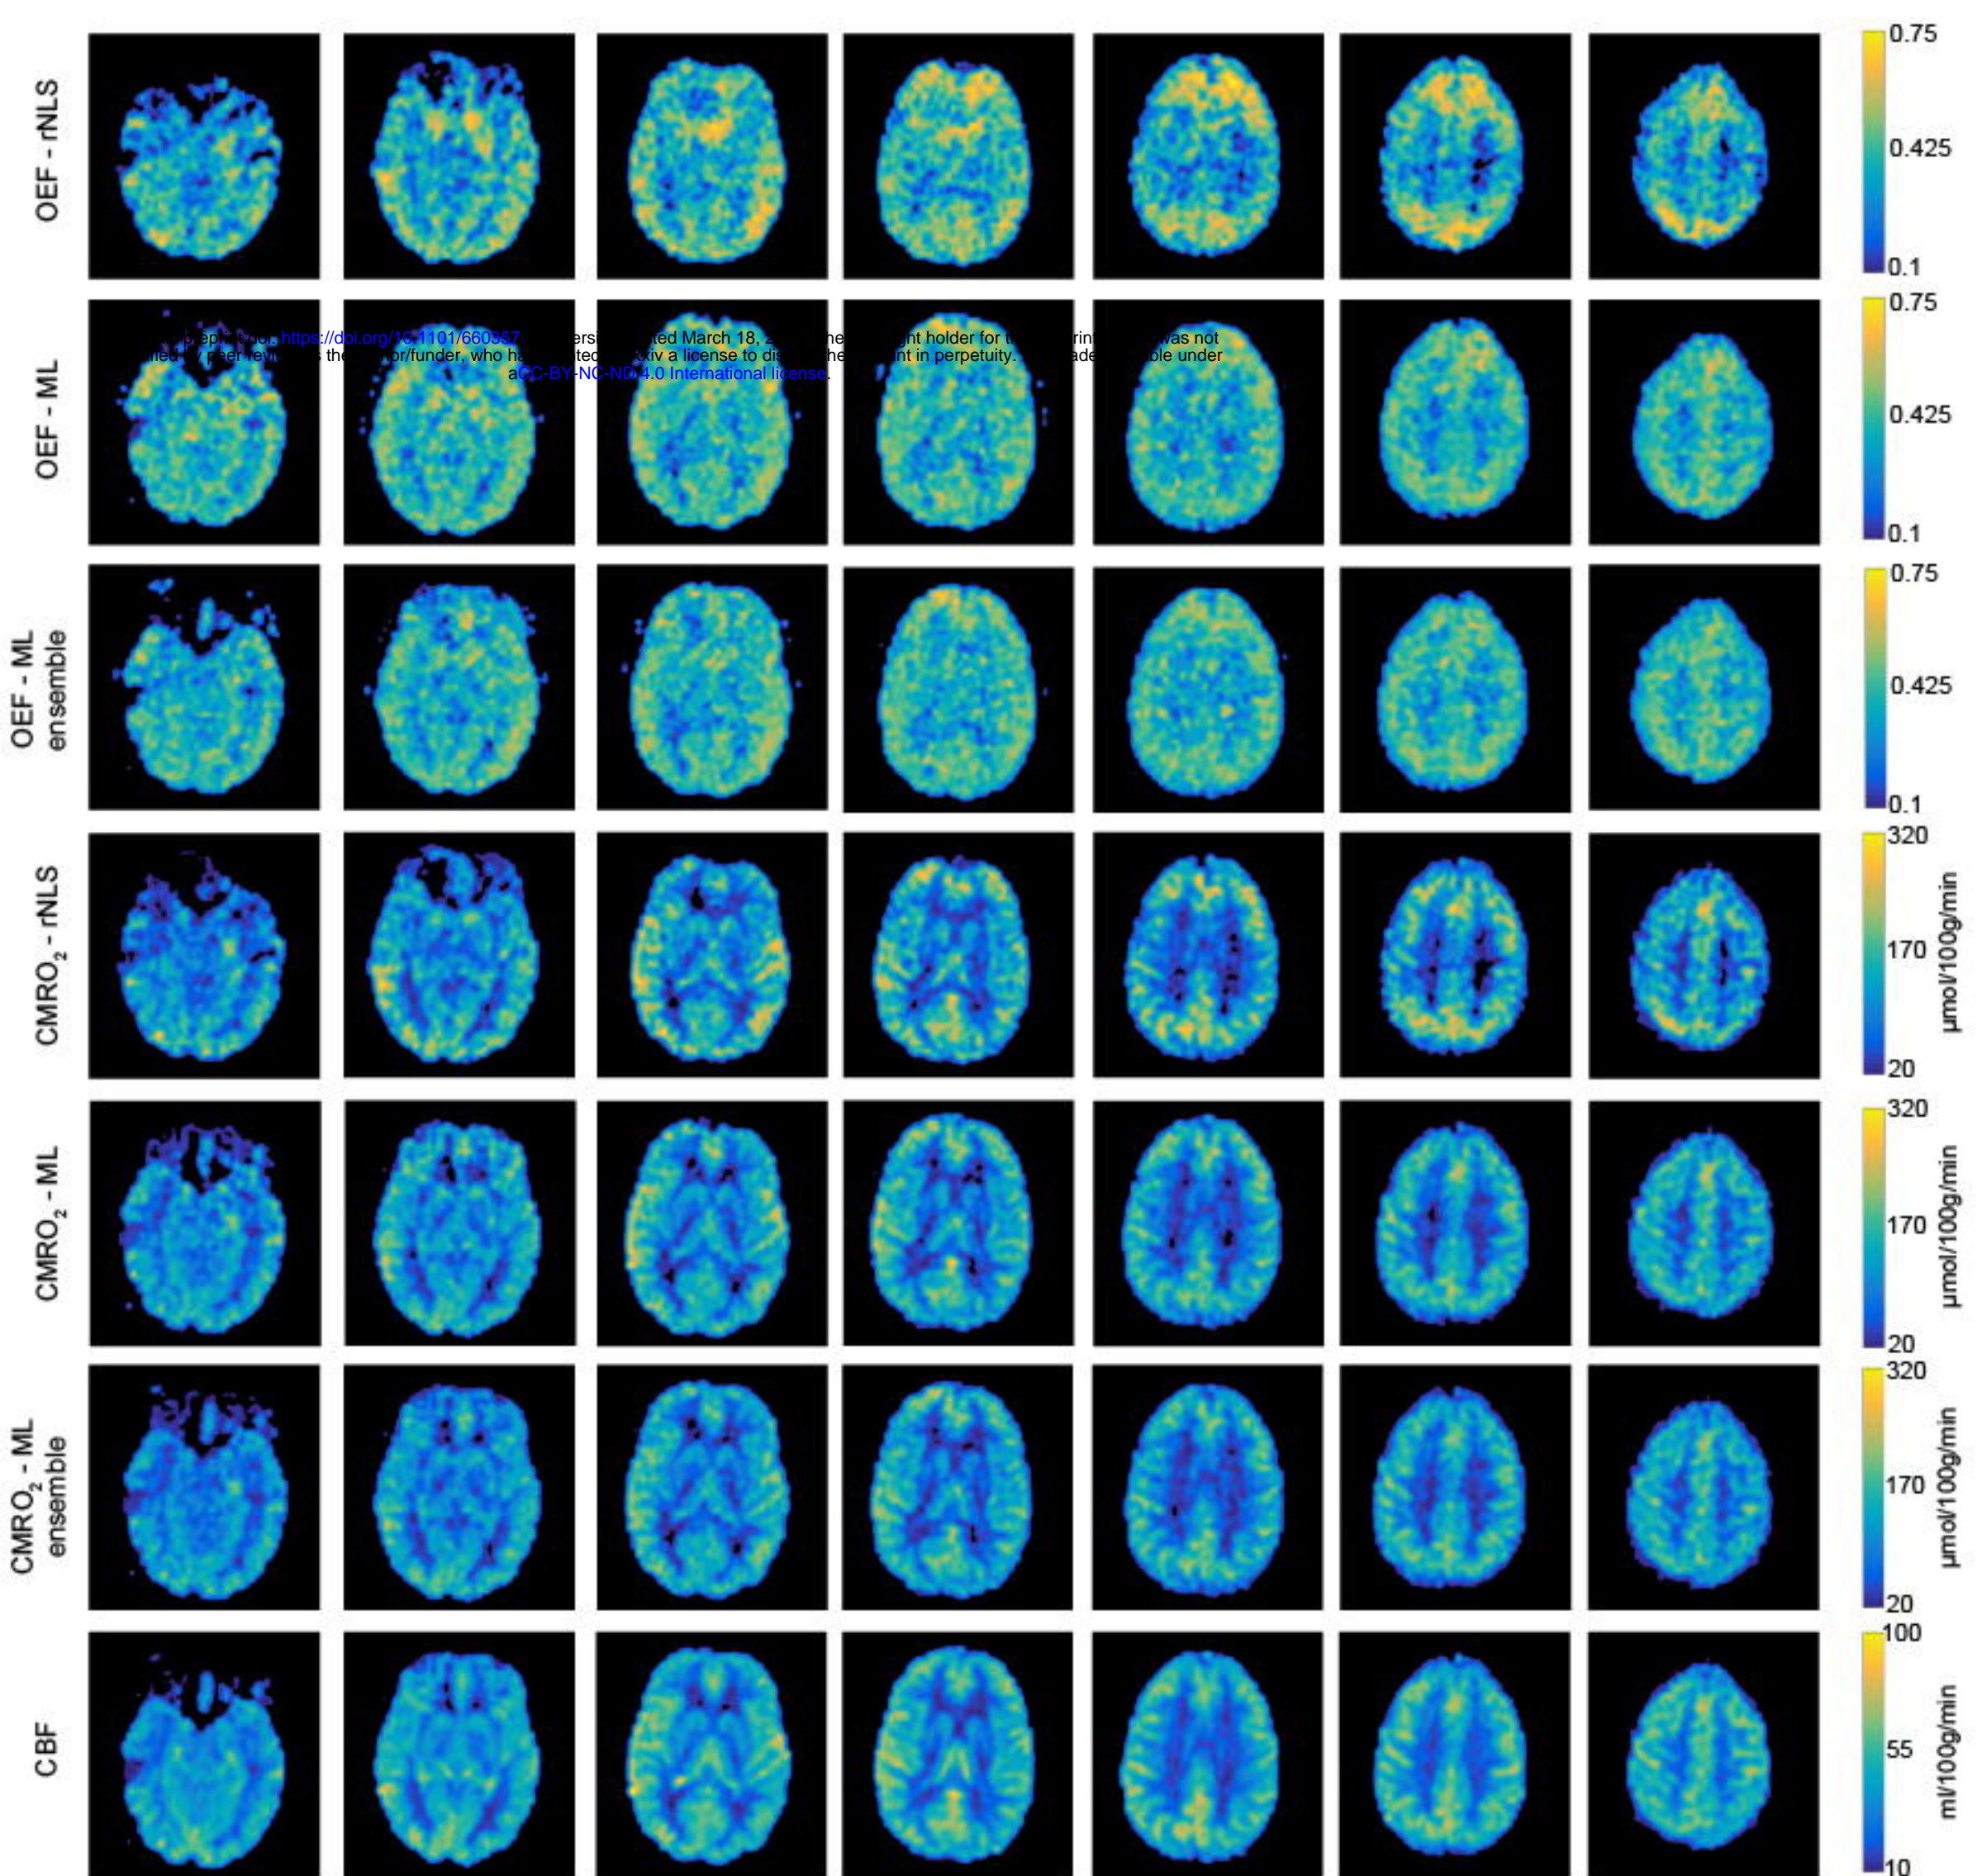

Figure 6. Example parameter maps ( $\text{CBF}_0$ ,  $\text{OEF}_0$ , and  $\text{CMRO}_{2,0}$ ) from a single subject for each analysis method. Machine learning estimates of  $\text{OEF}_0$  are more uniform than regularized non-linear least squares estimates. Using an ensemble of MLP networks further reduces the spatial variation in  $\text{OEF}_0$  estimates.
